# Supplementary material for: A gene catalogue of the Sprague-Dawley rat gut metagenome
Source: PubMed Central journal article supplement (PMC5967468; doi:10.1093/gigascience/giy055), 2018-05-11

|                                                      |                                                                                                                                                                                                                                                                                                                                                                                                                                                                                                                                                                                                                                                                                                                                                                                                                                                                                                                                            |                 |
|------------------------------------------------------|--------------------------------------------------------------------------------------------------------------------------------------------------------------------------------------------------------------------------------------------------------------------------------------------------------------------------------------------------------------------------------------------------------------------------------------------------------------------------------------------------------------------------------------------------------------------------------------------------------------------------------------------------------------------------------------------------------------------------------------------------------------------------------------------------------------------------------------------------------------------------------------------------------------------------------------------|-----------------|
| <b>Manuscript Number:</b>                            | GIGA-D-17-00275                                                                                                                                                                                                                                                                                                                                                                                                                                                                                                                                                                                                                                                                                                                                                                                                                                                                                                                            |                 |
| <b>Full Title:</b>                                   | A gene catalogue of Sprague-Dawley (SD) rat gut metagenome                                                                                                                                                                                                                                                                                                                                                                                                                                                                                                                                                                                                                                                                                                                                                                                                                                                                                 |                 |
| <b>Article Type:</b>                                 | Data Note                                                                                                                                                                                                                                                                                                                                                                                                                                                                                                                                                                                                                                                                                                                                                                                                                                                                                                                                  |                 |
| <b>Funding Information:</b>                          | Macau Technology Development Fund (102/2016/A3)                                                                                                                                                                                                                                                                                                                                                                                                                                                                                                                                                                                                                                                                                                                                                                                                                                                                                            | Prof. Liang Liu |
|                                                      | Shenzhen Municipal Government of China (JSGG20160229172752028, JCYJ20160229172757249)                                                                                                                                                                                                                                                                                                                                                                                                                                                                                                                                                                                                                                                                                                                                                                                                                                                      | Mrs Huijie Jia  |
| <b>Abstract:</b>                                     | <p>Laboratory rats like Sprague-Dawley (SD) are crucial for studying human physiological or pathogenic processes including microbiome. To explore the comprehensively composable and functional alterations on perturbed microbe-host interactions in inflammatory arthritic rats, we establish the gene set of Sprague-Dawley (SD) rat gut metagenome for the first time using ninety-eight fecal samples of 49 SD rats from 7 individual groups at 2 different time points (Day 0 and Day 30). The established gene set comprised 5,130,167 non-redundant genes with an average length of 750 base pairs (BP). 69.5% of reads could be aligned to our gene set, which is higher than the alignment rate for human and mouse gut metagenome. This established gene catalogue of SD rats gut metagenome has adequate reference value in adjuvant-induced arthritis SD rats and can promote further research on the rat gut microbiome.</p> |                 |
| <b>Corresponding Author:</b>                         | Liang Liu<br><br>CHINA                                                                                                                                                                                                                                                                                                                                                                                                                                                                                                                                                                                                                                                                                                                                                                                                                                                                                                                     |                 |
| <b>Corresponding Author Secondary Information:</b>   |                                                                                                                                                                                                                                                                                                                                                                                                                                                                                                                                                                                                                                                                                                                                                                                                                                                                                                                                            |                 |
| <b>Corresponding Author's Institution:</b>           |                                                                                                                                                                                                                                                                                                                                                                                                                                                                                                                                                                                                                                                                                                                                                                                                                                                                                                                                            |                 |
| <b>Corresponding Author's Secondary Institution:</b> |                                                                                                                                                                                                                                                                                                                                                                                                                                                                                                                                                                                                                                                                                                                                                                                                                                                                                                                                            |                 |
| <b>First Author:</b>                                 | Hudan Pan                                                                                                                                                                                                                                                                                                                                                                                                                                                                                                                                                                                                                                                                                                                                                                                                                                                                                                                                  |                 |
| <b>First Author Secondary Information:</b>           |                                                                                                                                                                                                                                                                                                                                                                                                                                                                                                                                                                                                                                                                                                                                                                                                                                                                                                                                            |                 |
| <b>Order of Authors:</b>                             | Hudan Pan<br>Ruijin Guo<br>Jie Zhu<br>Qi Wang<br>Yanmei Ju<br>Ying Xie<br>Yanfang Zheng<br>Zhifeng Wang<br>Ting Li<br>Zhongqiu Liu<br>Linlin Lu<br>Fei Li<br>Chenchen Zhang<br>Bin Tong                                                                                                                                                                                                                                                                                                                                                                                                                                                                                                                                                                                                                                                                                                                                                    |                 |

|                                                                                                                                                                                                                                                                                                                                                                                                                                                                                               |                      |
|-----------------------------------------------------------------------------------------------------------------------------------------------------------------------------------------------------------------------------------------------------------------------------------------------------------------------------------------------------------------------------------------------------------------------------------------------------------------------------------------------|----------------------|
|                                                                                                                                                                                                                                                                                                                                                                                                                                                                                               | Xiaopng Li           |
|                                                                                                                                                                                                                                                                                                                                                                                                                                                                                               | Yuanqiang Zou        |
|                                                                                                                                                                                                                                                                                                                                                                                                                                                                                               | Liang Xiao           |
|                                                                                                                                                                                                                                                                                                                                                                                                                                                                                               | Xun Xu               |
|                                                                                                                                                                                                                                                                                                                                                                                                                                                                                               | Hui Wang             |
|                                                                                                                                                                                                                                                                                                                                                                                                                                                                                               | Elaine Lai-Han Leung |
|                                                                                                                                                                                                                                                                                                                                                                                                                                                                                               | Runze Li             |
|                                                                                                                                                                                                                                                                                                                                                                                                                                                                                               | Zhongwen Yuan        |
|                                                                                                                                                                                                                                                                                                                                                                                                                                                                                               | Rutong Ren           |
|                                                                                                                                                                                                                                                                                                                                                                                                                                                                                               | Huanming Yang        |
|                                                                                                                                                                                                                                                                                                                                                                                                                                                                                               | Jian Wang            |
|                                                                                                                                                                                                                                                                                                                                                                                                                                                                                               | Hua Zhou             |
|                                                                                                                                                                                                                                                                                                                                                                                                                                                                                               | Huijue Jia           |
|                                                                                                                                                                                                                                                                                                                                                                                                                                                                                               | Liang Liu            |
| <b>Order of Authors Secondary Information:</b>                                                                                                                                                                                                                                                                                                                                                                                                                                                |                      |
| <b>Opposed Reviewers:</b>                                                                                                                                                                                                                                                                                                                                                                                                                                                                     |                      |
| <b>Additional Information:</b>                                                                                                                                                                                                                                                                                                                                                                                                                                                                |                      |
| <b>Question</b>                                                                                                                                                                                                                                                                                                                                                                                                                                                                               | <b>Response</b>      |
| Are you submitting this manuscript to a special series or article collection?                                                                                                                                                                                                                                                                                                                                                                                                                 | No                   |
| <b>Experimental design and statistics</b><br><br>Full details of the experimental design and statistical methods used should be given in the Methods section, as detailed in our <a href="#">Minimum Standards Reporting Checklist</a> . Information essential to interpreting the data presented should be made available in the figure legends.<br><br>Have you included all the information requested in your manuscript?                                                                  | Yes                  |
| <b>Resources</b><br><br>A description of all resources used, including antibodies, cell lines, animals and software tools, with enough information to allow them to be uniquely identified, should be included in the Methods section. Authors are strongly encouraged to cite <a href="#">Research Resource Identifiers</a> (RRIDs) for antibodies, model organisms and tools, where possible.<br><br>Have you included the information requested as detailed in our <a href="#">Minimum</a> | Yes                  |

|                                                                                                                                                                                                                                                                                                                                                                                                                                                                                                                                                         |     |
|---------------------------------------------------------------------------------------------------------------------------------------------------------------------------------------------------------------------------------------------------------------------------------------------------------------------------------------------------------------------------------------------------------------------------------------------------------------------------------------------------------------------------------------------------------|-----|
| <a href="#">Standards Reporting Checklist?</a>                                                                                                                                                                                                                                                                                                                                                                                                                                                                                                          |     |
| <p><b>Availability of data and materials</b></p> <p>All datasets and code on which the conclusions of the paper rely must be either included in your submission or deposited in <a href="#">publicly available repositories</a> (where available and ethically appropriate), referencing such data using a unique identifier in the references and in the “Availability of Data and Materials” section of your manuscript.</p> <p>Have you have met the above requirement as detailed in our <a href="#">Minimum Standards Reporting Checklist?</a></p> | Yes |

## A gene catalogue of Sprague-Dawley (SD) rat gut metagenome

Hudan Pan<sup>1,9</sup>, Ruijin Guo<sup>1,2,3,9</sup>, Jie Zhu<sup>2,3,9</sup>, Qi Wang<sup>2,3,6,9</sup>, Yanmei Ju<sup>2,3,9</sup>, Ying Xie<sup>1</sup>, Yanfang Zheng<sup>1,5</sup>, Zhifeng Wang<sup>2,3</sup>, Ting Li<sup>1</sup>, Zhongqiu Liu<sup>4</sup>, Linlin Lu<sup>4</sup>, Fei Li<sup>2,3,6</sup>, Chenchen Zhang<sup>2,3</sup>, Bin Tong<sup>2,3</sup>, Xiaoping Li<sup>2,3</sup>, Yuanqiang Zou<sup>2,3</sup>, Liang Xiao<sup>2,3,7</sup>, Xun Xu<sup>2,3</sup>, Hui Wang<sup>1</sup>, Elaine Lai-Han Leung<sup>1</sup>, Runze Li<sup>1</sup>, Zhongwen Yuan<sup>1</sup>, Rutong Ren<sup>1</sup>, Huanming Yang<sup>2,3,8</sup>, Jian Wang<sup>2,3,8</sup>, Hua Zhou<sup>1</sup>, Huijue Jia<sup>2,3</sup>, & Liang Liu<sup>1</sup>

<sup>1</sup>State Key Laboratory of Quality Research in Chinese Medicine/Macao Institute for Applied Research in Medicine and Health, Macao University of Science and Technology, Macao, China

<sup>2</sup>BGI-Shenzhen, Shenzhen 518083, China

<sup>3</sup>China National Genebank, BGI-Shenzhen, Shenzhen 518120, China

<sup>4</sup>International Institute for Translational Research of Traditional Chinese Medicine of Guangzhou University of Chinese Medicine, Guangzhou, Guangdong 510006, China

<sup>5</sup>Fujian University of Traditional Chinese Medicine, No.1, Qiuyang Road, Minhou Shangjie, Fuzhou, Fujian 350122, China

<sup>6</sup>BGI Education Center, University of Chinese Academy of Sciences, Shenzhen 518083, China

<sup>7</sup>Shenzhen Engineering Laboratory of Detection and Intervention of human intestinal microbiome, BGI-Shenzhen, Shenzhen 518083, China

<sup>8</sup>James D. Watson Institute of Genome Sciences, Hangzhou 310058, China

<sup>9</sup>These authors contributed equally to this work.

Correspondence and requests for materials should be addressed to Liang Liu ([lliu@must.edu.mo](mailto:lliu@must.edu.mo)) or Huijue Jia ([jiahuijue@genomics.cn](mailto:jiahuijue@genomics.cn))

1           **Abstract**

2  
3           Laboratory rats like Sprague-Dawley (SD) are crucial for studying human physiological or pathogenic  
4  
5  
6           processes including microbiome. To explore the comprehensively composable and functional  
7  
8  
9           alterations on perturbed microbe-host interactions in inflammatory arthritic rats, we establish the gene  
10  
11  
12           set of Sprague-Dawley (SD) rat gut metagenome for the first time using ninety-eight fecal samples of  
13  
14  
15           49 SD rats from 7 individual groups at 2 different time points (Day 0 and Day 30). The established  
16  
17           gene set comprised 5,130,167 non-redundant genes with an average length of 750 base pairs (BP). 69.5%  
18  
19  
20           of reads could be aligned to our gene set, which is higher than the alignment rate for human and mouse  
21  
22  
23           gut metagenome. This established gene catalogue of SD rats gut metagenome has adequate reference  
24  
25           value in adjuvant-induced arthritis SD rats and can promote further research on the rat gut microbiome.  
26

27  
28           **Background**

29  
30  
31           The microbiota resident in the human colon is a complex ecological community, which has been found  
32  
33  
34           to be crucial for biological processes [1, 2]. Enabled by next generation sequencing technologies, we  
35  
36  
37           have obtained a large amount of information about the compositions and gene content of the human  
38  
39           health or disease related microbial communities [3-5]. However, for ethical or religious considerations,  
40  
41  
42           host-microbe interactions are difficult to study in the human and studies have therefore been limited to  
43  
44  
45           the analysis of fecal samples without the crosstalk to host physiological or pathogenic processes.  
46  
47  
48           Studies in laboratory animal experiments expand our basic knowledge of human life sciences including  
49  
50  
51           microbiome and are important to develop a better understanding of gut microbiota in pre-clinical state  
52  
53           for human microbiota studies [6, 7].

54  
55  
56           Rheumatoid arthritis (RA) is a devastating immune disorder with poorly defined etiologies and no  
57  
58  
59           curative treatments[8]. Cross-sectional studies have revealed microbial disorder for RA patients which  
60  
61  
62  
63  
64  
65

1 partly reversed after RA treatment [5], indicating that microbiota has a closely correlation in the  
2  
3 occurrence, progression and treatment of RA. Animal models can provide new knowledge on the  
4  
5 relationship between microbiome and RA and contribute to innovative microbial drug development,  
6  
7 among which Adjuvant-induced arthritis (AA) is one of the most widely accepted animal model [9-12].  
8  
9 Rats (*Rattus norvegicus*) are among the most widely and frequently used laboratory animals. Since  
10  
11 1959 Professor Bengt Erik Gustafsson firstly designed stainless steel isolators to raise germ-free (GF)  
12  
13 rats, many researchers used GF rats to explore host-microbiota interactions in life science fields,  
14  
15 including metabolic disorder [13], replantation [14], inflammatory response [15] and immune  
16  
17 process[16]. Based on humanized gnotobiotic models, inoculation of human gut microbiota into GF  
18  
19 rats provide a powerful tool in understanding the causality and effect of gut microbiota in the  
20  
21 human-like system. However, as humans are never in a truly GF state, the use of GF animals in  
22  
23 preclinical work does not directly mimic the human condition. It is still unknown that how colonies of  
24  
25 microbiota are established and changed, how the synergy or inhibition interactions in different  
26  
27 microbes shape microbial compositions and how the host affects the populations of microbiota. To  
28  
29 study the crosstalk of microbial and host more comprehensively, establishing a comprehensive  
30  
31 catalogue of the rat gut metagenome is urgently needed. Sprague-Dawley (SD) is the most widely used  
32  
33 outbred rat in biomedical research, known for its genetic variability. It is extensively used to develop  
34  
35 animal models of human conditions such as diabetes [17], obesity[18], cancer[19], cardiovascular  
36  
37 diseases[20] and adjuvant-induced arthritis could also be induced in SD rats. The gut microbiota profile  
38  
39 of SD rats has been found more similar to that of humans than the microbiota profile of mice using 16S  
40  
41 gene sequencing[21]. Here, we collected fecal samples from SD rats to build their gut metagenome by  
42  
43 BGISEQ-500 whole-metagenome shotgun sequencing for the first time. As metagenome composition  
44  
45  
46  
47  
48  
49  
50  
51  
52  
53  
54  
55  
56  
57  
58  
59  
60  
61  
62  
63  
64  
65

1 varied markedly with age, diet and immune environment, we provide information on these different  
2  
3 factors to give a useful reference for future studies, especially for the research of arthritis on SD rat  
4  
5 animal model.  
6

### 7 8 9 **Ethics statement**

10  
11 All experimental procedures were conducted in conformity with institutional guidelines for the care  
12  
13 and use of laboratory animals in China, and animal welfare and experimental procedures were strictly  
14  
15 in accordance with the guide for the care and use of laboratory animals (National Research Council of  
16  
17 USA, 1996). This study has been also approved by the Institutional Review Board on Bioethics and  
18  
19 Biosafety (Reference number: BGI-FT 16090).  
20  
21  
22

### 23 24 25 **Data Description**

26  
27 49 Male Sprague-Dawley (SD) rats weighing approximately 60 g (around 4 weeks) were purchased  
28  
29 from Guangdong Medical Laboratory Animal Center (Guangzhou, China). The rats were randomly  
30  
31 divided into 7 groups using random number table [Normal control, AIA model, *Lactobacillus casei*  
32  
33 (*L.casei*) (2\*10<sup>8</sup> CFU/day), MTX (7.6mg/kg/week), GJK (24g/kg/d), ZQFTN (50mg/kg/d) and high fat  
34  
35 diet] and maintained in individually ventilated caging(IVC) system under laboratory conditions at  
36  
37 25 °C and with a normal 12 h/12 h light/dark cycle with humidity of 55%. The rats were allowed 14  
38  
39 days to adapt to the laboratory environment before adjuvant arthritis induction. They were fed with  
40  
41 standard diet (6/7cages) or high fat diet (high fat diet group, 1/7 cages) and water ad libitum throughout  
42  
43 the adaptation and experience process. On day 0 of the experience, we collected fecal samples from the  
44  
45 49 rats for the first time and adjuvant arthritis was induced then in the six groups except normal control  
46  
47 group by a single subcutaneous injection of 0.1 mL of complete Freund's adjuvant (CFA) [containing  
48  
49 0.2mg of Mycobacterium tuberculosis (MT) H37Ra (BD, Sparks, USA), mineral oils [Sigma-Aldrich,  
50  
51  
52  
53  
54  
55  
56  
57  
58  
59  
60  
61  
62  
63  
64  
65

USA] into the root of rat tail[11]. Equal amount of saline was injected to the normal control group.

From day 0 to day 30, rats were treated with *L.casei* (2\*10<sup>8</sup> CFU/day), MTX (7.6mg/kg/week), GJK (24g/kg/d) and ZQFTN (50mg/kg/d) respectively. Normal control group, AA model group and high fat diet group were given 0.3% CMC-Na instead. Body weights of the 49 rats were detected every three days (Table S1). On day 7, 14, 21 and day 30, we collected fecal samples from the total 49 rats for the other four times and the rats were sacrificed on day 30 by cervical dislocation. All the collected fecal samples were immediately put into drikold to ensure quality.

The source of fecal samples for establishment and assessment the gene catalogue of gut microbiome in SD rats has been shown in Fig.1. We used 98 fecal samples on day 0 and day30 to establish the gene reference catalogue and the rest 147 samples to assess the quality of the established gene set.

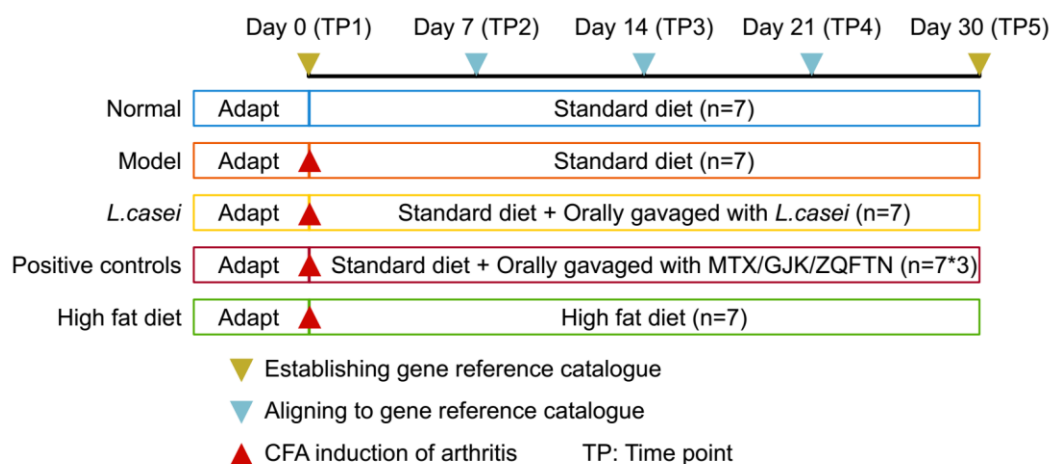

**Figure 1. The source of fecal samples for establishment and assessment the gene catalogue of gut microbiome in SD rats.** Forty-nine SD rats were grouped into seven groups containing normal rats (n=7), AIA rats treated with vehicle(n=7), *L.casei*(n=7), MTX(n=7), GJK(n=7), ZQFNT(n=7) and AIA(n=7) rats fed with high fat diet. Arthritis was induced by complete Freund's adjuvant (CFA) on Day 0 after fecal samples collection and fecal samples from the 49 SD rats



1 were collected for 5 time points (TP) on Day 0 (TP1), Day 7 (TP2), Day 14 (TP3), Day 21 (TP4),  
2  
3 Day 30 (TP5).  
4

#### 5 **DNA extraction**

6  
7  
8  
9 Fecal samples were thawed on ice and DNA extraction was performed using the QIAamp<sup>®</sup> DNA Stool  
10 Mini Kit (Qiagen, Valencia, CA, USA). Extracts were treated with DNase-free RNase to eliminate  
11 RNA contamination. DNA quantity was determined using Qubit 3.0 fluorometer with the Quant-iT<sup>™</sup>  
12 dsDNA BR Assay Kit. The integrity of DNA was evaluated on the 2% gel electrophoresis [22].  
13  
14  
15  
16  
17  
18  
19

#### 20 **Library construction and sequencing**

21  
22 We constructed sequencing library followed the BGISEQ-500 instruction. The standard protocol as  
23 described in ref, including DNA fragmentation and selection, end repair and a-tailing, and  
24 circularization [23].  
25  
26  
27  
28  
29

30 Two types of sequencing strategies, paired-end (PE) and single-end (SE), was performed on an  
31 BGISEQ-500 platform with read length 50 bp (insert size ~250bp) and 100 bp respectively. In total, we  
32 generated 12,621,796,886 reads of PE50 and 11,654,248,439 reads of SE100, representing ~2,512.6 Gb  
33 of raw data (**Table S2, Table S3**).  
34  
35  
36  
37  
38  
39  
40

#### 41 **Data preprocess**

42 High quality reads will facilitate performance of metagenomic assembly by improve length and  
43 accuracy[24]. Briefly, following steps were processed by our in-house Perl script to remove or trim low  
44 quality reads[25].  
45  
46  
47  
48  
49  
50

51 (i) reads that more than 3 of 'N' bases within were removed;

52  
53 (ii) contiguous bases, which were counted from 3'-end of a read, with quality value less than 3 were  
54 trimmed;  
55  
56  
57  
58  
59  
60  
61  
62  
63  
64  
65

1 (iii) After step i and ii, the reads with minimum length of 90bp and of 40nt for SE reads and PE reads  
2  
3 were remained.  
4

5  
6 As expected, a large proportion of BGISEQ-500 sequence, 95.93% ~ 98.80% and 96.47% ~ 98.61% for  
7  
8 reads of SE100 and PE50, respectively, were remained as high-quality reads. Further, we aligned clean  
9  
10 reads to host genomics DNA (NCBI accession no. NC\_005100) used SOAP aligner v2.22 and an  
11  
12 average 9.76% clean reads of SE100 and 11.2% clean reads of PE50 corresponding to host(rat) genome  
13  
14 were removed. Finally, we obtained total high-quality data of ~1,689.24Gb for SE100and ~534.69 Gb  
15  
16 for PE50, with an average of 5.21 Gb per sample (**Table S2, Table S3**) [25, 26].  
17  
18  
19  
20  
21

### 22 **Metagenomics sequences de novo assembly**

23  
24 High-quality reads from each DNA samples of Day 0 and Day 30 were selected to perform de novo  
25  
26 assembly independently. We merged high-quality reads of PE50 and SE100 from one sample and  
27  
28 assembled them into longer contigs using the IDBA-UD(v1.1.3) by iterated Kmer[27]. Contigs  
29  
30 constructed at each iteration would be used as long-reads for the next iteration with following  
31  
32 command line:  
33  
34  
35  
36  
37

```
38 idba_ud -r pe.fa -l se.fa --mink 27 --maxk 97 --step 10 -o out_dir --num_threads 24
```

39  
40 A total of 67.67% of the reads were assembled into ~22.9 million contigs with N50 of 5.36Kb, giving a  
41  
42 total contig length of ~32.3Gb (**Table S2**).  
43  
44  
45  
46

### 47 **Establishment of a catalogue of the SD rat gut metagenome**

48  
49 Before conducting gene prediction, we filtered the assembled sequence of each of the 98 samples and  
50  
51 considered only the contigs with a length exceeding 500 bases. These remained contig were therefore  
52  
53 subjected to predicted Open reading frames(ORFs) using the Prodigal(v2.6.1) with procedure  
54  
55 ‘meta’[28]. In order to fuse orthologues and avoid inflation of possible sequencing errors, we grouped  
56  
57  
58  
59  
60  
61  
62  
63  
64  
65

1 sharing ORFs using CD-HIT with a criterion of 95% identity over 90% of the shorter ORF length with  
 2  
 3 default parameter except “-G 0 -n 8 -aS 0.9 -c 0.95 -d 0 -g 1”[29]. After this time-consuming process,  
 4  
 5  
 6 the longest ORF in each group was selected to represent the group and other members of the group  
 7  
 8 were termed as redundancy.  
 9

10  
 11 Finally, the ORFs with length less than 100bp were removed and the non-redundant gene set contained  
 12  
 13 as many as 5,130,167 ORFs with average length of 750 bp. To assess the representation of the SD rat  
 14  
 15 gut microbiome in our non-redundant gene set, we back aligned them by reads of SE100 from all the  
 16  
 17 245 samples in 7 groups across five collection time-points, using SOAPaligner2 with the 90% identity  
 18  
 19 threshold. A total of 69.5% of reads could be aligned to our gene set and these reads were employed to  
 20  
 21 compute relative abundance of each gene in our catalogue (**Fig. 2, Table S2**).  
 22  
 23  
 24  
 25  
 26

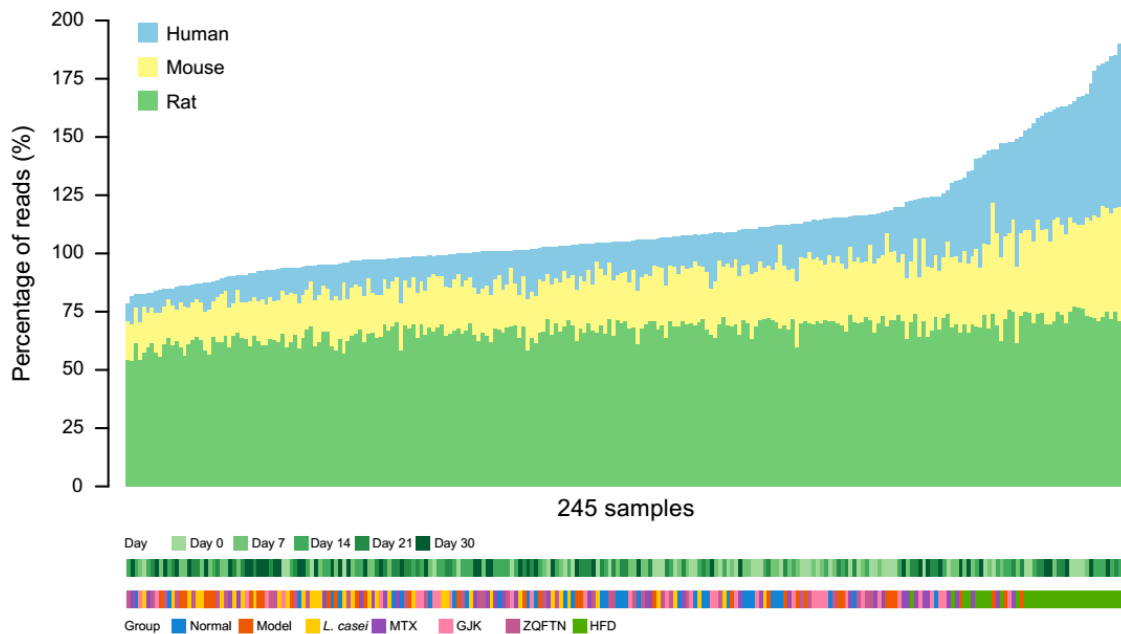

27  
 28  
 29  
 30  
 31  
 32  
 33  
 34  
 35  
 36  
 37  
 38  
 39  
 40  
 41  
 42  
 43  
 44  
 45  
 46  
 47  
 48  
 49  
 50 **Figure 2. The gene catalogue of the gut microbiome in SD rats** Percentage of total reads in this  
 51  
 52 study (n=245 samples) that could be mapped to gene catalogues of the gut microbiome in human (red),  
 53  
 54 mouse (blue) and rat (green). Collection time and groups of the samples are shown for reference.  
 55  
 56  
 57

58 **Gene richness**  
 59  
 60  
 61  
 62  
 63  
 64  
 65

1 Rarefaction curve analysis is a method to estimate the richness of gene set, based on the observed gene  
 2 number in each sampling [22]. For a given number of samples at Day0 or Day30, we calculated the total  
 3 number of identified gene after 100 random samplings with replacement. The rarefaction analysis  
 4 number of identified gene after 100 random samplings with replacement. The rarefaction analysis  
 5 revealed a curve approaching saturation, suggesting that our gene set includes most of the known SD  
 6 rat gut bacterial genes (Fig. 3). Notably, the samples at Day30 had higher gene count than samples at  
 7 Day0 (Fig. 3).

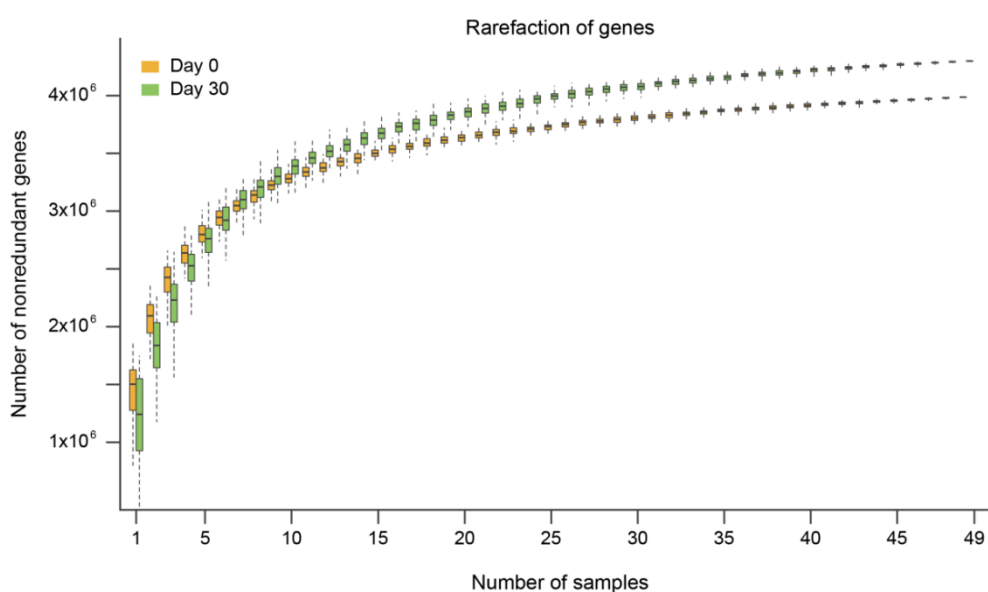

37 **Figure 3. Rarefaction of genes in fecal samples on day 0 and day 30.** Amounts of  
 38 non-redundant genes were detected along with the increasing numbers of samples (n=49 for each  
 39 time point). Yellow: fecal samples from 49 SD rats on day 0; Green: fecal samples from 49 SD  
 40 rats on day 30.

#### 48 Taxonomic assignment

49 Taxonomic assignment of the predicted genes was done according to the NCBI-NR database and  
 50 Integrated Microbial Genomes (IMG, v400) database using an in-house pipeline detailed  
 51 previously[22]. Of the 5,130,167 genes, 64.6% and 26.7% were annotated to the phylum and genus  
 52 levels, respectively, while only 9% were annotated to the species level (Fig. 4). At the phylum level,  
 53  
 54  
 55  
 56  
 57  
 58  
 59  
 60  
 61  
 62  
 63  
 64  
 65

1 most of the annotated genes belonged to Firmicutes (75.90%), followed by Bacteroidetes (10.83%) and  
 2  
 3 Proteobacteria (6.77%)(Fig. 4). At the genus level, the annotated genes (5.30%) primarily belonged to  
 4  
 5 Clostridium (8.74%), followed by Bacteroides (6.25%), Roseburia (4.75%), Ruminococcus (4.44%)  
 6  
 7 and Lachnoclostridium (2.58%), reflecting the paucity of the sequenced rat gut bacterial genomes (Fig.  
 8  
 9  
 10  
 11  
 12 4).

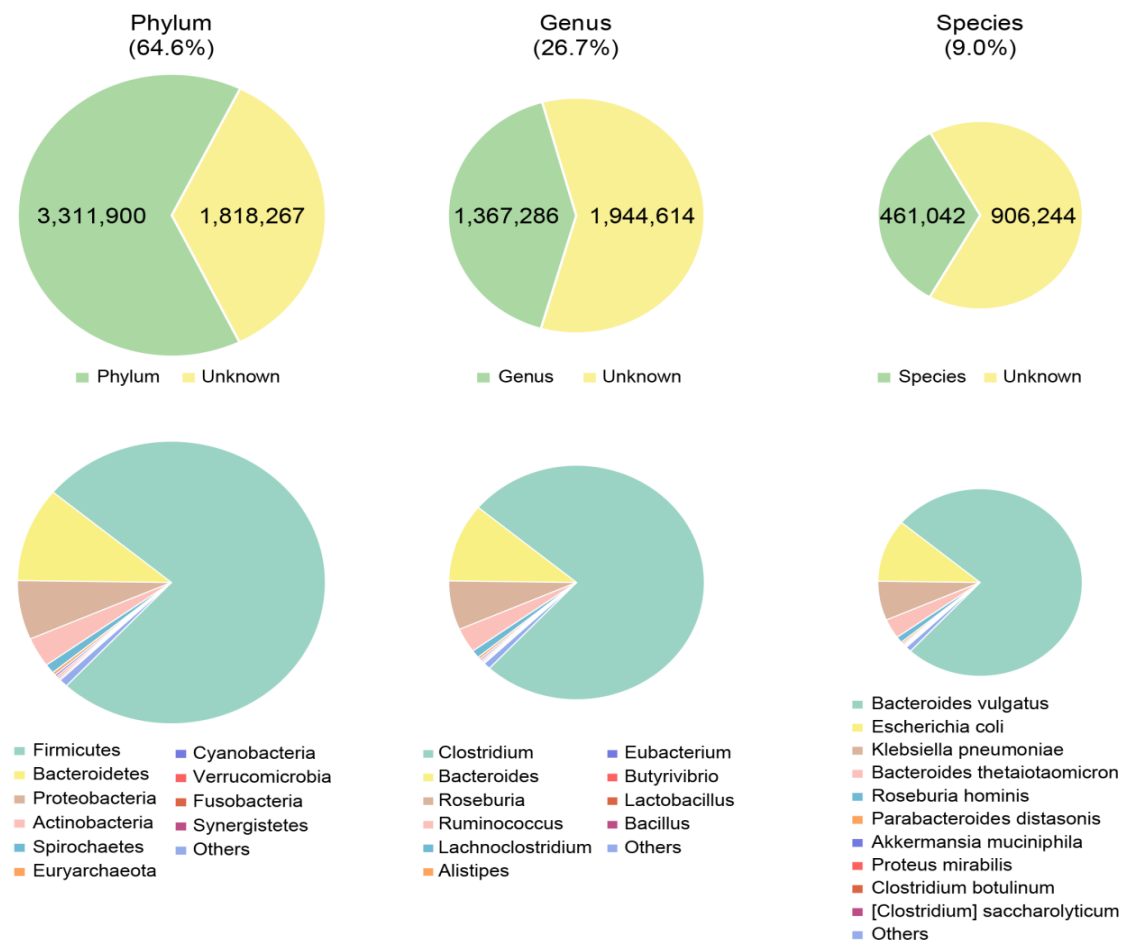

13  
14  
15  
16  
17  
18  
19  
20  
21  
22  
23  
24  
25  
26  
27  
28  
29  
30  
31  
32  
33  
34  
35  
36  
37  
38  
39  
40  
41  
42  
43  
44  
45  
46 **Figure 4. The annotation of the non-redundant genes to phylum, genus and species.** The  
 47  
 48 non-redundant genes that could be annotated to phylum, genus and species are shown with the  
 49  
 50 amounts and rates in the upper part. Green: the area of green reflects the rates of the genes that  
 51  
 52 could be annotated to phylum, genus and species. Yellow: the area of yellow reflects unknown  
 53  
 54 genes. The composition of the annotated genes in phylum, genus and species were displayed  
 55  
 56 below, respectively.  
 57  
 58  
 59  
 60  
 61  
 62  
 63  
 64  
 65

## Gene functional classification

Putative amino acid sequences were translated from the gene catalogue and searched against the proteins /domains in KEGG database (release v79.0, with animal and plant genes removed) using BLASTP v2.2.26, with the default parameters except “-m 8 -e 1e-5 -F F -a 6 -b 50”. Each protein was assigned to a KEGG homologues by the highest scoring annotated hit(s) containing at least on high-scoring segment pair(HSP) scoring over 60 bits.

Functionally, 53.1%, 21.8% and 31% of the genes could be annotated to the KEGG orthologous groups (KOs), modules and pathways, respectively. These results will be beneficial for future rat gut microbiome studies, specifically for SD rats of the same origin (Fig. 5).

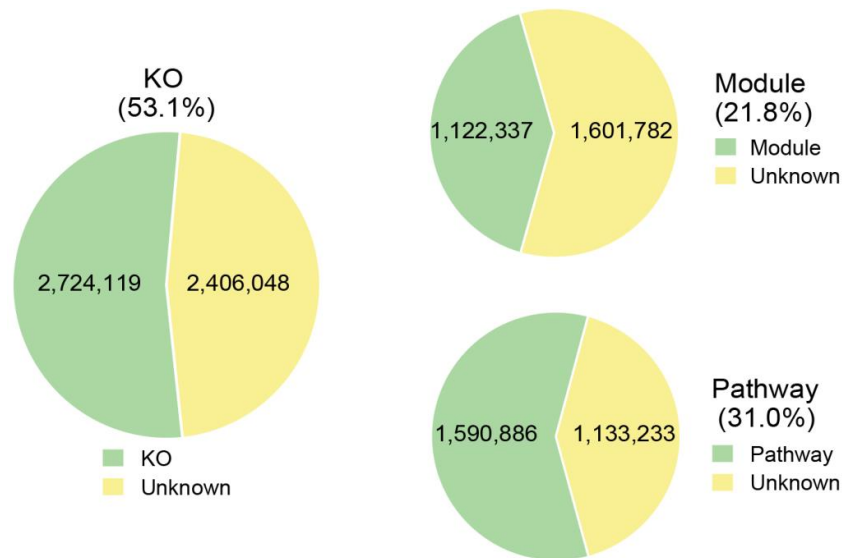

**Figure 5. The annotation rates of the non-redundant genes to KO, module and pathway.** KO: Kyoto Encyclopedia of Genes and Genomes orthologous groups (KOs). The non-redundant genes that could be annotated to KO, module and pathway are shown with rates. Green: the area of green reflects the rates of the genes that could be annotated to KO, module and pathway. Yellow: the area of white reflects unknown function annotation.

## Comparison of human, mouse, rat gene catalogue

1 To compare the SD rat gut metagenome catalogue with the mouse and the human gut metagenome  
2 catalogues, we also aligned all the reads of SE100 of 245 samples to their non-redundant gene set,  
3 which contained ~11.4 million and ~ 2.6 million genes, respectively[30, 31]. An average of 20.45% and  
4 25.41% of the reads were allowed for mapping to mouse and human non-redundant gene set (Fig. 6).  
5  
6 By contrast, a much higher mapping ratio of the reads to SD rat non-redundant gene set, on average  
7 68.82%, confirming the utility of this reference (Table S4). Further, we compared the percentage of the  
8 genes assigned the top 6 phyla and genera in three catalogues.  
9  
10 Interestingly, the ratios of Firmicutes(75.90%) and Bacteroidetes(10.83%) we observed at the phylum  
11 level are similar to those found in mice and are markedly different with the human microbiome (Fig.  
12 6).  
13  
14  
15  
16  
17  
18  
19  
20  
21  
22  
23  
24  
25  
26  
27  
28  
29  
30  
31  
32  
33  
34  
35  
36  
37  
38  
39  
40  
41  
42  
43  
44  
45  
46  
47  
48  
49  
50  
51  
52  
53  
54  
55  
56  
57  
58  
59  
60  
61  
62  
63  
64  
65

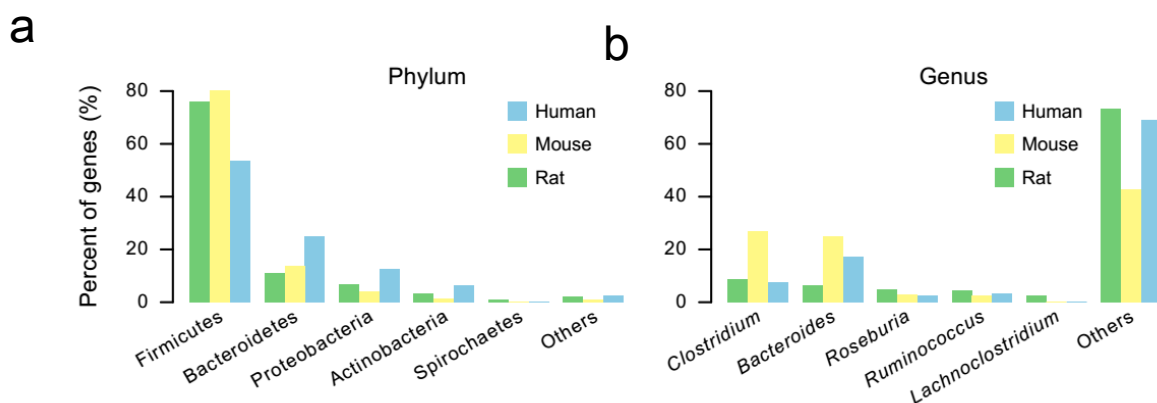

Figure 6. The composition of the rat, human and mouse gut microbiome catalogues at the phylum and genus levels were also compared. (a) In phyla level, percentages of *Firmicutes*, *Bacteroidetes*, *Proteobacteria*, *Actinobacteria*, *Spirochaetes* and others in rat, human and mouse were also detected in rat, human and mouse respectively. (b) Percentage of genes in genera including *Clostridium*, *Bacteroides*, *Roseburia*, *Ruminococcus*, *Lachnocostridium* and others were compared in the gut microbial gene catalogues of rat, human and mouse.

## Conclusions

The newly established catalogue of the SD rat gut metagenome comprised ~5.1 million (M) non-redundant genes, which is more than the published 2.6 M mouse gut microbial gene catalogue. Even with limited rat strains, Sanger sequencing and rearing conditions, the gene catalogue has adequate reference value in AA SD rats and can promote further research on the rat gut microbiome, as its complexity can be enhanced as more samples are analyzed, similar to the human gut metagenome establishing process[30].

## Funding

This work was financially supported by grants from the Macau Technology Development Fund (102/2016/A3) and the Shenzhen Municipal Government of China (JSGG20160229172752028, JCYJ20160229172757249).

## Availability of supporting data

The sequencing reads from each sequencing library have been deposited at EBI with the accession number: PRJEB22973. The reference catalogue of 5.1 million genes and other related data in this paper are available in the GigaScience database. All supplementary figures and tables are provided in Additional file.

## Conflicts of interest

The authors declare no competing financial interests.

## Reference

1. Sommer, F., et al., *The resilience of the intestinal microbiota influences health and disease*. Nature reviews. Microbiology, 2017. **15**(10): p. 630-638.



- 1 2. Lynch, S.V. and O. Pedersen, *The Human Intestinal Microbiome in Health and*  
2  
3  
4 *Disease*. The New England journal of medicine, 2016. **375**(24): p. 2369-2379.  
5
- 6 3. Quince, C., et al., *Shotgun metagenomics, from sampling to analysis*. Nature  
7  
8  
9 biotechnology, 2017. **35**(9): p. 833-844.  
10
- 11 4. Liu, R., et al., *Gut microbiome and serum metabolome alterations in obesity and after*  
12  
13 *weight-loss intervention*. Nature medicine, 2017. **23**(7): p. 859-868.  
14
- 15 5. Zhang, X., et al., *The oral and gut microbiomes are perturbed in rheumatoid arthritis*  
16  
17 *and partly normalized after treatment*. Nature medicine, 2015. **21**(8): p. 895-905.  
18
- 19 6. Johnson, C.L. and J. Versalovic, *The human microbiome and its potential importance*  
20  
21 *to pediatrics*. Pediatrics, 2012. **129**(5): p. 950-60.  
22
- 23 7. Lloyd-Price, J., G. Abu-Ali, and C. Huttenhower, *The healthy human microbiome*.  
24  
25  
26  
27  
28  
29  
30  
31  
32  
33  
34  
35  
36  
37  
38  
39  
40  
41  
42  
43  
44  
45  
46  
47  
48  
49  
50  
51  
52  
53  
54  
55  
56  
57  
58  
59  
60  
61  
62  
63  
64  
65  
66  
67  
68  
69  
70  
71  
72  
73  
74  
75  
76  
77  
78  
79  
80  
81  
82  
83  
84  
85  
86  
87  
88  
89  
90  
91  
92  
93  
94  
95  
96  
97  
98  
99  
100  
101  
102  
103  
104  
105  
106  
107  
108  
109  
110  
111  
112  
113  
114  
115  
116  
117  
118  
119  
120  
121  
122  
123  
124  
125  
126  
127  
128  
129  
130  
131  
132  
133  
134  
135  
136  
137  
138  
139  
140  
141  
142  
143  
144  
145  
146  
147  
148  
149  
150  
151  
152  
153  
154  
155  
156  
157  
158  
159  
160  
161  
162  
163  
164  
165  
166  
167  
168  
169  
170  
171  
172  
173  
174  
175  
176  
177  
178  
179  
180  
181  
182  
183  
184  
185  
186  
187  
188  
189  
190  
191  
192  
193  
194  
195  
196  
197  
198  
199  
200  
201  
202  
203  
204  
205  
206  
207  
208  
209  
210  
211  
212  
213  
214  
215  
216  
217  
218  
219  
220  
221  
222  
223  
224  
225  
226  
227  
228  
229  
230  
231  
232  
233  
234  
235  
236  
237  
238  
239  
240  
241  
242  
243  
244  
245  
246  
247  
248  
249  
250  
251  
252  
253  
254  
255  
256  
257  
258  
259  
260  
261  
262  
263  
264  
265  
266  
267  
268  
269  
270  
271  
272  
273  
274  
275  
276  
277  
278  
279  
280  
281  
282  
283  
284  
285  
286  
287  
288  
289  
290  
291  
292  
293  
294  
295  
296  
297  
298  
299  
300  
301  
302  
303  
304  
305  
306  
307  
308  
309  
310  
311  
312  
313  
314  
315  
316  
317  
318  
319  
320  
321  
322  
323  
324  
325  
326  
327  
328  
329  
330  
331  
332  
333  
334  
335  
336  
337  
338  
339  
340  
341  
342  
343  
344  
345  
346  
347  
348  
349  
350  
351  
352  
353  
354  
355  
356  
357  
358  
359  
360  
361  
362  
363  
364  
365  
366  
367  
368  
369  
370  
371  
372  
373  
374  
375  
376  
377  
378  
379  
380  
381  
382  
383  
384  
385  
386  
387  
388  
389  
390  
391  
392  
393  
394  
395  
396  
397  
398  
399  
400  
401  
402  
403  
404  
405  
406  
407  
408  
409  
410  
411  
412  
413  
414  
415  
416  
417  
418  
419  
420  
421  
422  
423  
424  
425  
426  
427  
428  
429  
430  
431  
432  
433  
434  
435  
436  
437  
438  
439  
440  
441  
442  
443  
444  
445  
446  
447  
448  
449  
450  
451  
452  
453  
454  
455  
456  
457  
458  
459  
460  
461  
462  
463  
464  
465  
466  
467  
468  
469  
470  
471  
472  
473  
474  
475  
476  
477  
478  
479  
480  
481  
482  
483  
484  
485  
486  
487  
488  
489  
490  
491  
492  
493  
494  
495  
496  
497  
498  
499  
500  
501  
502  
503  
504  
505  
506  
507  
508  
509  
510  
511  
512  
513  
514  
515  
516  
517  
518  
519  
520  
521  
522  
523  
524  
525  
526  
527  
528  
529  
530  
531  
532  
533  
534  
535  
536  
537  
538  
539  
540  
541  
542  
543  
544  
545  
546  
547  
548  
549  
550  
551  
552  
553  
554  
555  
556  
557  
558  
559  
560  
561  
562  
563  
564  
565  
566  
567  
568  
569  
570  
571  
572  
573  
574  
575  
576  
577  
578  
579  
580  
581  
582  
583  
584  
585  
586  
587  
588  
589  
590  
591  
592  
593  
594  
595  
596  
597  
598  
599  
600  
601  
602  
603  
604  
605  
606  
607  
608  
609  
610  
611  
612  
613  
614  
615  
616  
617  
618  
619  
620  
621  
622  
623  
624  
625  
626  
627  
628  
629  
630  
631  
632  
633  
634  
635  
636  
637  
638  
639  
640  
641  
642  
643  
644  
645  
646  
647  
648  
649  
650  
651  
652  
653  
654  
655  
656  
657  
658  
659  
660  
661  
662  
663  
664  
665  
666  
667  
668  
669  
670  
671  
672  
673  
674  
675  
676  
677  
678  
679  
680  
681  
682  
683  
684  
685  
686  
687  
688  
689  
690  
691  
692  
693  
694  
695  
696  
697  
698  
699  
700  
701  
702  
703  
704  
705  
706  
707  
708  
709  
710  
711  
712  
713  
714  
715  
716  
717  
718  
719  
720  
721  
722  
723  
724  
725  
726  
727  
728  
729  
730  
731  
732  
733  
734  
735  
736  
737  
738  
739  
740  
741  
742  
743  
744  
745  
746  
747  
748  
749  
750  
751  
752  
753  
754  
755  
756  
757  
758  
759  
760  
761  
762  
763  
764  
765  
766  
767  
768  
769  
770  
771  
772  
773  
774  
775  
776  
777  
778  
779  
780  
781  
782  
783  
784  
785  
786  
787  
788  
789  
790  
791  
792  
793  
794  
795  
796  
797  
798  
799  
800  
801  
802  
803  
804  
805  
806  
807  
808  
809  
810  
811  
812  
813  
814  
815  
816  
817  
818  
819  
820  
821  
822  
823  
824  
825  
826  
827  
828  
829  
830  
831  
832  
833  
834  
835  
836  
837  
838  
839  
840  
841  
842  
843  
844  
845  
846  
847  
848  
849  
850  
851  
852  
853  
854  
855  
856  
857  
858  
859  
860  
861  
862  
863  
864  
865  
866  
867  
868  
869  
870  
871  
872  
873  
874  
875  
876  
877  
878  
879  
880  
881  
882  
883  
884  
885  
886  
887  
888  
889  
890  
891  
892  
893  
894  
895  
896  
897  
898  
899  
900  
901  
902  
903  
904  
905  
906  
907  
908  
909  
910  
911  
912  
913  
914  
915  
916  
917  
918  
919  
920  
921  
922  
923  
924  
925  
926  
927  
928  
929  
930  
931  
932  
933  
934  
935  
936  
937  
938  
939  
940  
941  
942  
943  
944  
945  
946  
947  
948  
949  
950  
951  
952  
953  
954  
955  
956  
957  
958  
959  
960  
961  
962  
963  
964  
965  
966  
967  
968  
969  
970  
971  
972  
973  
974  
975  
976  
977  
978  
979  
980  
981  
982  
983  
984  
985  
986  
987  
988  
989  
990  
991  
992  
993  
994  
995  
996  
997  
998  
999  
1000
10. Pearson, C.M. and F.D. Wood, *Studies of arthritis and other lesions induced in rats by*  
the injection of mycobacterial adjuvant. VII. Pathologic details of the arthritis and  
spondylitis. The American journal of pathology, 1963. **42**: p. 73-95.
11. Cai, X., et al., *Manipulation of the induction of adjuvant arthritis in Sprague-Dawley*

1 *rats*. Inflammation research : official journal of the European Histamine Research  
2  
3 Society ... [et al.], 2006. **55**(9): p. 368-77.  
4  
5

6 12. Hegen, M., et al., *Utility of animal models for identification of potential therapeutics for*  
7  
8 *rheumatoid arthritis*. Annals of the rheumatic diseases, 2008. **67**(11): p. 1505-15.  
9

10  
11 13. Arora, T., et al., *Diabetes-associated microbiota in fa/fa rats is modified by Roux-en-Y*  
12  
13 *gastric bypass*. The ISME journal, 2017. **11**(9): p. 2035-2046.  
14  
15

16  
17 14. Nishioka, M., et al., *Tooth replantation in germ-free and conventional rats*.  
18  
19 Endodontics & dental traumatology, 1998. **14**(4): p. 163-73.  
20  
21

22  
23 15. Anderson, R.C., et al., *Human oral isolate Lactobacillus fermentum AGR1487 induces*  
24  
25 *a pro-inflammatory response in germ-free rat colons*. Scientific reports, 2016. **6**: p.  
26  
27 20318.  
28  
29

30  
31 16. Patrick, C., et al., *Promotion of autoimmune diabetes by cereal diet in the presence or*  
32  
33 *absence of microbes associated with gut immune activation, regulatory imbalance,*  
34  
35 *and altered cathelicidin antimicrobial Peptide*. Diabetes, 2013. **62**(6): p. 2036-47.  
36  
37

38  
39 17. Srinivasan, K., et al., *Combination of high-fat diet-fed and low-dose*  
40  
41 *streptozotocin-treated rat: a model for type 2 diabetes and pharmacological screening*.  
42  
43 Pharmacological research, 2005. **52**(4): p. 313-20.  
44  
45

46  
47 18. Levin, B.E., et al., *Selective breeding for diet-induced obesity and resistance in*  
48  
49 *Sprague-Dawley rats*. The American journal of physiology, 1997. **273**(2 Pt 2): p.  
50  
51 R725-30.  
52  
53

54  
55 19. Zhang, R. and L. Lao, *A new rat model of bone cancer pain*. Methods in molecular  
56  
57 biology, 2012. **851**: p. 261-73.  
58  
59  
60  
61  
62  
63  
64  
65

- 1  
2  
3  
4  
5  
6  
7  
8  
9  
10  
11  
12  
13  
14  
15  
16  
17  
18  
19  
20  
21  
22  
23  
24  
25  
26  
27  
28  
29  
30  
31  
32  
33  
34  
35  
36  
37  
38  
39  
40  
41  
42  
43  
44  
45  
46  
47  
48  
49  
50  
51  
52  
53  
54  
55  
56  
57  
58  
59  
60  
61  
62  
63  
64  
65
20. Delbosc, S., et al., *Involvement of oxidative stress and NADPH oxidase activation in the development of cardiovascular complications in a model of insulin resistance, the fructose-fed rat*. *Atherosclerosis*, 2005. **179**(1): p. 43-9.
  21. Flemer, B., et al., *Fecal microbiota variation across the lifespan of the healthy laboratory rat*. *Gut microbes*, 2017. **8**(5): p. 428-439.
  22. Qin, J., et al., *A metagenome-wide association study of gut microbiota in type 2 diabetes*. *Nature*, 2012. **490**(7418): p. 55-60.
  23. Huang, J., et al., *A reference human genome dataset of the BGISEQ-500 sequencer*. *GigaScience*, 2017. **6**(5): p. 1-9.
  24. Mende, D.R., et al., *Assessment of metagenomic assembly using simulated next generation sequencing data*. *PloS one*, 2012. **7**(2): p. e31386.
  25. Kultima, J.R., et al., *MOCAT: a metagenomics assembly and gene prediction toolkit*. *PloS one*, 2012. **7**(10): p. e47656.
  26. Li, R., et al., *SOAP2: an improved ultrafast tool for short read alignment*. *Bioinformatics*, 2009. **25**(15): p. 1966-7.
  27. Peng, Y., et al., *IDBA-UD: a de novo assembler for single-cell and metagenomic sequencing data with highly uneven depth*. *Bioinformatics*, 2012. **28**(11): p. 1420-8.
  28. Hyatt, D., et al., *Prodigal: prokaryotic gene recognition and translation initiation site identification*. *BMC bioinformatics*, 2010. **11**: p. 119.
  29. Li, W. and A. Godzik, *Cd-hit: a fast program for clustering and comparing large sets of protein or nucleotide sequences*. *Bioinformatics*, 2006. **22**(13): p. 1658-9.
  30. Xie, H., et al., *Shotgun Metagenomics of 250 Adult Twins Reveals Genetic and*

1 *Environmental Impacts on the Gut Microbiome*. Cell systems, 2016. **3**(6): p. 572-584

2  
3 e3.

4  
5  
6 31. Xiao, L., et al., *A catalog of the mouse gut metagenome*. Nature biotechnology, 2015.

7  
8  
9 **33**(10): p. 1103-8.

10  
11  
12  
13  
14  
15  
16  
17  
18  
19  
20  
21  
22  
23  
24  
25  
26  
27  
28  
29  
30  
31  
32  
33  
34  
35  
36  
37  
38  
39  
40  
41  
42  
43  
44  
45  
46  
47  
48  
49  
50  
51  
52  
53  
54  
55  
56  
57  
58  
59  
60  
61  
62  
63  
64  
65

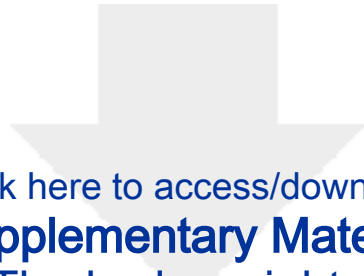

Click here to access/download  
**Supplementary Material**  
sTable1. The body weight of rats.xlsx

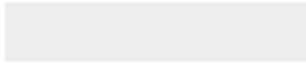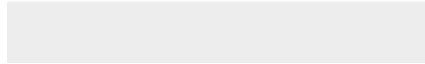

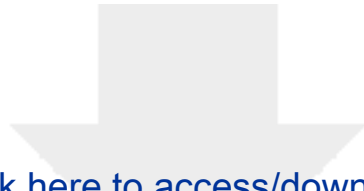

Click here to access/download  
**Supplementary Material**  
sTable2.Data for Gene catalogue.xlsx

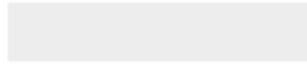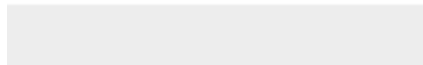

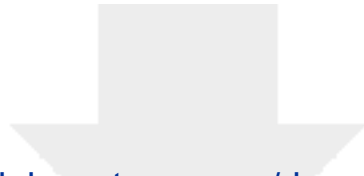

[Click here to access/download](#)

**Supplementary Material**

[sTable3.Reads of SE100 for Alignment.xlsx](#)

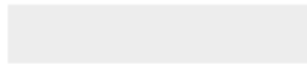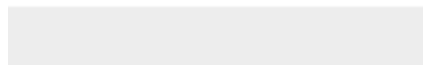



Click here to access/download  
**Supplementary Material**  
sTable4.Mapping to Catalogues.xlsx



Supplement: giy055_giga-d-17-00275_original_submission.pdf [file giy055_giga-d-17-00275_original_submission.pdf]
