# Supplementary material for: A gene catalogue of the Sprague-Dawley rat gut metagenome
Source: PubMed Central journal article supplement (PMC5967468; doi:10.1093/gigascience/giy055), 2018-05-11

|                                                      |                                                                                                                                                                                                                                                                                                                                                                                                                                                                                                                                                                                                                                                                                                                                                                                                                                                                                                                                                                                                                                                                                                                                |                 |
|------------------------------------------------------|--------------------------------------------------------------------------------------------------------------------------------------------------------------------------------------------------------------------------------------------------------------------------------------------------------------------------------------------------------------------------------------------------------------------------------------------------------------------------------------------------------------------------------------------------------------------------------------------------------------------------------------------------------------------------------------------------------------------------------------------------------------------------------------------------------------------------------------------------------------------------------------------------------------------------------------------------------------------------------------------------------------------------------------------------------------------------------------------------------------------------------|-----------------|
| <b>Manuscript Number:</b>                            | GIGA-D-17-00275R1                                                                                                                                                                                                                                                                                                                                                                                                                                                                                                                                                                                                                                                                                                                                                                                                                                                                                                                                                                                                                                                                                                              |                 |
| <b>Full Title:</b>                                   | A gene catalogue of the Sprague-Dawley rat gut metagenome                                                                                                                                                                                                                                                                                                                                                                                                                                                                                                                                                                                                                                                                                                                                                                                                                                                                                                                                                                                                                                                                      |                 |
| <b>Article Type:</b>                                 | Data Note                                                                                                                                                                                                                                                                                                                                                                                                                                                                                                                                                                                                                                                                                                                                                                                                                                                                                                                                                                                                                                                                                                                      |                 |
| <b>Funding Information:</b>                          | Macau Technology Development Fund (102/2016/A3)                                                                                                                                                                                                                                                                                                                                                                                                                                                                                                                                                                                                                                                                                                                                                                                                                                                                                                                                                                                                                                                                                | Prof. Liang Liu |
|                                                      | Shenzhen Municipal Government of China (JSGG20160229172752028, JCYJ20160229172757249)                                                                                                                                                                                                                                                                                                                                                                                                                                                                                                                                                                                                                                                                                                                                                                                                                                                                                                                                                                                                                                          | Mrs Huijue Jia  |
|                                                      | National Natural Science Foundation of China (81670606)                                                                                                                                                                                                                                                                                                                                                                                                                                                                                                                                                                                                                                                                                                                                                                                                                                                                                                                                                                                                                                                                        | Mr Liang Xiao   |
| <b>Abstract:</b>                                     | <p>Laboratory rats such as the Sprague-Dawley (SD) rats are important model for biomedical studies in relation to human physiological or pathogenic processes. Here we report on the first catalog of microbial genes in fecal samples from Sprague-Dawley rats. The catalog was established using 98 fecal samples from 49 SD rats divided in 7 experimental groups collected at different time points 30 days apart. The established gene catalog comprises 5,130,167 non-redundant genes with an average length of 750 base pairs (BP), among which 64.6% and 26.7% were annotated to phylum and genus levels, respectively. Functionally, 53.1%, 21.8% and 31% of the genes could be annotated to KEGG orthologous groups (KOs), modules and pathways, respectively. A comparison of rat gut metagenome catalogue with human or mouse revealed a higher pairwise overlap between rats and humans (2.47%) than between mice and humans (1.19%) at the gene level. 97% of the functional pathways in the human catalog were present in the rat catalogue underscoring the potential use of rats for biomedical research.</p> |                 |
| <b>Corresponding Author:</b>                         | Liang Liu<br><br>CHINA                                                                                                                                                                                                                                                                                                                                                                                                                                                                                                                                                                                                                                                                                                                                                                                                                                                                                                                                                                                                                                                                                                         |                 |
| <b>Corresponding Author Secondary Information:</b>   |                                                                                                                                                                                                                                                                                                                                                                                                                                                                                                                                                                                                                                                                                                                                                                                                                                                                                                                                                                                                                                                                                                                                |                 |
| <b>Corresponding Author's Institution:</b>           |                                                                                                                                                                                                                                                                                                                                                                                                                                                                                                                                                                                                                                                                                                                                                                                                                                                                                                                                                                                                                                                                                                                                |                 |
| <b>Corresponding Author's Secondary Institution:</b> |                                                                                                                                                                                                                                                                                                                                                                                                                                                                                                                                                                                                                                                                                                                                                                                                                                                                                                                                                                                                                                                                                                                                |                 |
| <b>First Author:</b>                                 | Hudan Pan                                                                                                                                                                                                                                                                                                                                                                                                                                                                                                                                                                                                                                                                                                                                                                                                                                                                                                                                                                                                                                                                                                                      |                 |
| <b>First Author Secondary Information:</b>           |                                                                                                                                                                                                                                                                                                                                                                                                                                                                                                                                                                                                                                                                                                                                                                                                                                                                                                                                                                                                                                                                                                                                |                 |
| <b>Order of Authors:</b>                             | Hudan Pan                                                                                                                                                                                                                                                                                                                                                                                                                                                                                                                                                                                                                                                                                                                                                                                                                                                                                                                                                                                                                                                                                                                      |                 |
|                                                      | Ruijin Guo                                                                                                                                                                                                                                                                                                                                                                                                                                                                                                                                                                                                                                                                                                                                                                                                                                                                                                                                                                                                                                                                                                                     |                 |
|                                                      | Jie Zhu                                                                                                                                                                                                                                                                                                                                                                                                                                                                                                                                                                                                                                                                                                                                                                                                                                                                                                                                                                                                                                                                                                                        |                 |
|                                                      | Qi Wang                                                                                                                                                                                                                                                                                                                                                                                                                                                                                                                                                                                                                                                                                                                                                                                                                                                                                                                                                                                                                                                                                                                        |                 |
|                                                      | Yanmei Ju                                                                                                                                                                                                                                                                                                                                                                                                                                                                                                                                                                                                                                                                                                                                                                                                                                                                                                                                                                                                                                                                                                                      |                 |
|                                                      | Ying Xie                                                                                                                                                                                                                                                                                                                                                                                                                                                                                                                                                                                                                                                                                                                                                                                                                                                                                                                                                                                                                                                                                                                       |                 |
|                                                      | Yanfang Zheng                                                                                                                                                                                                                                                                                                                                                                                                                                                                                                                                                                                                                                                                                                                                                                                                                                                                                                                                                                                                                                                                                                                  |                 |
|                                                      | Zhifeng Wang                                                                                                                                                                                                                                                                                                                                                                                                                                                                                                                                                                                                                                                                                                                                                                                                                                                                                                                                                                                                                                                                                                                   |                 |
|                                                      | Ting Li                                                                                                                                                                                                                                                                                                                                                                                                                                                                                                                                                                                                                                                                                                                                                                                                                                                                                                                                                                                                                                                                                                                        |                 |
|                                                      | Zhongqiu Liu                                                                                                                                                                                                                                                                                                                                                                                                                                                                                                                                                                                                                                                                                                                                                                                                                                                                                                                                                                                                                                                                                                                   |                 |
|                                                      | Linlin Lu                                                                                                                                                                                                                                                                                                                                                                                                                                                                                                                                                                                                                                                                                                                                                                                                                                                                                                                                                                                                                                                                                                                      |                 |

|                                                |                                                                                                                                                                                                                                                                                                                                                                                                                                                                                                                                                                                                                                                                                                                                                                                                                                                                                                                                                                                                                                                                                                                                                                                                                                                                                                                                                                                                                                                                                                                                                                                                                                                                                                                                                                                                                                                                                                                                                                                                                                                                                                                                                                                                                                                                                                                                                                                                                                                                                                                                                                                                                                                                                                                                                                                                                                                                                                                                                                                                                                                                                  |
|------------------------------------------------|----------------------------------------------------------------------------------------------------------------------------------------------------------------------------------------------------------------------------------------------------------------------------------------------------------------------------------------------------------------------------------------------------------------------------------------------------------------------------------------------------------------------------------------------------------------------------------------------------------------------------------------------------------------------------------------------------------------------------------------------------------------------------------------------------------------------------------------------------------------------------------------------------------------------------------------------------------------------------------------------------------------------------------------------------------------------------------------------------------------------------------------------------------------------------------------------------------------------------------------------------------------------------------------------------------------------------------------------------------------------------------------------------------------------------------------------------------------------------------------------------------------------------------------------------------------------------------------------------------------------------------------------------------------------------------------------------------------------------------------------------------------------------------------------------------------------------------------------------------------------------------------------------------------------------------------------------------------------------------------------------------------------------------------------------------------------------------------------------------------------------------------------------------------------------------------------------------------------------------------------------------------------------------------------------------------------------------------------------------------------------------------------------------------------------------------------------------------------------------------------------------------------------------------------------------------------------------------------------------------------------------------------------------------------------------------------------------------------------------------------------------------------------------------------------------------------------------------------------------------------------------------------------------------------------------------------------------------------------------------------------------------------------------------------------------------------------------|
|                                                | Fei Li                                                                                                                                                                                                                                                                                                                                                                                                                                                                                                                                                                                                                                                                                                                                                                                                                                                                                                                                                                                                                                                                                                                                                                                                                                                                                                                                                                                                                                                                                                                                                                                                                                                                                                                                                                                                                                                                                                                                                                                                                                                                                                                                                                                                                                                                                                                                                                                                                                                                                                                                                                                                                                                                                                                                                                                                                                                                                                                                                                                                                                                                           |
|                                                | Bin Tong                                                                                                                                                                                                                                                                                                                                                                                                                                                                                                                                                                                                                                                                                                                                                                                                                                                                                                                                                                                                                                                                                                                                                                                                                                                                                                                                                                                                                                                                                                                                                                                                                                                                                                                                                                                                                                                                                                                                                                                                                                                                                                                                                                                                                                                                                                                                                                                                                                                                                                                                                                                                                                                                                                                                                                                                                                                                                                                                                                                                                                                                         |
|                                                | Liang Xiao                                                                                                                                                                                                                                                                                                                                                                                                                                                                                                                                                                                                                                                                                                                                                                                                                                                                                                                                                                                                                                                                                                                                                                                                                                                                                                                                                                                                                                                                                                                                                                                                                                                                                                                                                                                                                                                                                                                                                                                                                                                                                                                                                                                                                                                                                                                                                                                                                                                                                                                                                                                                                                                                                                                                                                                                                                                                                                                                                                                                                                                                       |
|                                                | Xun Xu                                                                                                                                                                                                                                                                                                                                                                                                                                                                                                                                                                                                                                                                                                                                                                                                                                                                                                                                                                                                                                                                                                                                                                                                                                                                                                                                                                                                                                                                                                                                                                                                                                                                                                                                                                                                                                                                                                                                                                                                                                                                                                                                                                                                                                                                                                                                                                                                                                                                                                                                                                                                                                                                                                                                                                                                                                                                                                                                                                                                                                                                           |
|                                                | Runze Li                                                                                                                                                                                                                                                                                                                                                                                                                                                                                                                                                                                                                                                                                                                                                                                                                                                                                                                                                                                                                                                                                                                                                                                                                                                                                                                                                                                                                                                                                                                                                                                                                                                                                                                                                                                                                                                                                                                                                                                                                                                                                                                                                                                                                                                                                                                                                                                                                                                                                                                                                                                                                                                                                                                                                                                                                                                                                                                                                                                                                                                                         |
|                                                | Zhongwen Yuan                                                                                                                                                                                                                                                                                                                                                                                                                                                                                                                                                                                                                                                                                                                                                                                                                                                                                                                                                                                                                                                                                                                                                                                                                                                                                                                                                                                                                                                                                                                                                                                                                                                                                                                                                                                                                                                                                                                                                                                                                                                                                                                                                                                                                                                                                                                                                                                                                                                                                                                                                                                                                                                                                                                                                                                                                                                                                                                                                                                                                                                                    |
|                                                | Huijue Jia                                                                                                                                                                                                                                                                                                                                                                                                                                                                                                                                                                                                                                                                                                                                                                                                                                                                                                                                                                                                                                                                                                                                                                                                                                                                                                                                                                                                                                                                                                                                                                                                                                                                                                                                                                                                                                                                                                                                                                                                                                                                                                                                                                                                                                                                                                                                                                                                                                                                                                                                                                                                                                                                                                                                                                                                                                                                                                                                                                                                                                                                       |
|                                                | Liang Liu                                                                                                                                                                                                                                                                                                                                                                                                                                                                                                                                                                                                                                                                                                                                                                                                                                                                                                                                                                                                                                                                                                                                                                                                                                                                                                                                                                                                                                                                                                                                                                                                                                                                                                                                                                                                                                                                                                                                                                                                                                                                                                                                                                                                                                                                                                                                                                                                                                                                                                                                                                                                                                                                                                                                                                                                                                                                                                                                                                                                                                                                        |
|                                                | Huanming Yang                                                                                                                                                                                                                                                                                                                                                                                                                                                                                                                                                                                                                                                                                                                                                                                                                                                                                                                                                                                                                                                                                                                                                                                                                                                                                                                                                                                                                                                                                                                                                                                                                                                                                                                                                                                                                                                                                                                                                                                                                                                                                                                                                                                                                                                                                                                                                                                                                                                                                                                                                                                                                                                                                                                                                                                                                                                                                                                                                                                                                                                                    |
|                                                | Jian Wang                                                                                                                                                                                                                                                                                                                                                                                                                                                                                                                                                                                                                                                                                                                                                                                                                                                                                                                                                                                                                                                                                                                                                                                                                                                                                                                                                                                                                                                                                                                                                                                                                                                                                                                                                                                                                                                                                                                                                                                                                                                                                                                                                                                                                                                                                                                                                                                                                                                                                                                                                                                                                                                                                                                                                                                                                                                                                                                                                                                                                                                                        |
|                                                | Karsten Kristiansen                                                                                                                                                                                                                                                                                                                                                                                                                                                                                                                                                                                                                                                                                                                                                                                                                                                                                                                                                                                                                                                                                                                                                                                                                                                                                                                                                                                                                                                                                                                                                                                                                                                                                                                                                                                                                                                                                                                                                                                                                                                                                                                                                                                                                                                                                                                                                                                                                                                                                                                                                                                                                                                                                                                                                                                                                                                                                                                                                                                                                                                              |
| <b>Order of Authors Secondary Information:</b> |                                                                                                                                                                                                                                                                                                                                                                                                                                                                                                                                                                                                                                                                                                                                                                                                                                                                                                                                                                                                                                                                                                                                                                                                                                                                                                                                                                                                                                                                                                                                                                                                                                                                                                                                                                                                                                                                                                                                                                                                                                                                                                                                                                                                                                                                                                                                                                                                                                                                                                                                                                                                                                                                                                                                                                                                                                                                                                                                                                                                                                                                                  |
| <b>Response to Reviewers:</b>                  | <p>Editorial Office<br/>Responses to "GIGA-D-17-00275"</p> <p>Thank you for your kind letter of December 8th, 2017. Based on your comment and request, we have made extensive modification on the original manuscript. We hereby send you the revised clean manuscript in the formats of both a PDF file and a MS word file for your consideration. We also include the revised manuscript with all the changes marked in red for easier comparison and editing purposes (see supplemental file). Below follow our responses to the comments and suggestions made by the reviewers.</p> <p>Responses to Reviewer #1:</p> <p>General comment: The data described in this manuscript presents many levels of genetic information from rat feces. It will likely be used as a reference by researchers working in gut function and characterization, and is therefore a valuable contribution to the scientific community. Generally, I find that the manuscript needs English language editing and careful proofreading to weed out small irregularities (e.g. number inconsistencies? on p1.l12) and to make each section more concise (for example, but not only, the section on germ free animals which is not directly related to the present dataset). The experimental and bioinformatical procedure, including sample handling, DNA extraction, assembly, gene prediction, taxonomic assignment, and gene functional annotation is sound, and the descriptions are sufficient.</p> <p>Response: Thanks for your valuable suggestions. We have completely restructured the background section, and hope that it now appears easier to follow and relevant.</p> <p>Specific comments:</p> <p>1. Background, l40: I believe religious considerations are covered by ethics considerations and do not need to be mentioned.<br/>Response: We completely agree, and the section has been completely rewritten.</p> <p>2. DNA extraction, l26: the sentence "The standard protocol as described in ref, including DNA fragmentation and selection, end repair and a-tailing, and circularization" is not clear.<br/>Response: We have revised the section, so it now reads "We constructed sequencing library following the BGISEQ-500 instruction and using the standard protocol with minor modification. In brief, the genomic DNA was fragmented and DNA fragments between 100 base pairs (bp) and ~300 bp were selected. The selected DNA fragments were repaired and modified. A dTTP tailed adapter sequence was ligated to both ends of the DNA fragments and the fragments were further amplified and subjected single-strand circularization." (line 129-133 in the revised manuscript)</p> <p>3. Data preprocess, l56: "quality value less than 3...? which quality measure? Phred-like?<br/>Response: We used Phred quality score. The Section has been revised for clarification; it now reads "To remove or trim low quality reads we used our in-house Perl script and the quality was assessed by Phred quality score." ( line 140 in the revised manuscript)</p> |

4. Figure 5; include description of what the modules and pathways consist of somewhere in the text

Response: The compositions of the modules and pathways are now described in the text (line 214-217 in the revised manuscript). The section now reads "Among these, we noted metabolic functions including pathways or modules involved in carbohydrates, amino acid, and energy metabolism; environmental information processing including membrane transport pathways or modules and genetic information processing including replication and repair, translation and transcription (Table S4, S5 )."

5. Comparison of human, mouse, rat gene catalogue, 19: "...%of the reads were allowed for mapping to?. Not understandable

Response: The section has been revised. It now reads "An average of 20.45% and 25.41% of the reads of the SD rats mapped to the non-redundant gene sets of the mouse and human gut microbiome, respectively (Table S6)" (line 238-239 in the revised manuscript).

6. A discussion of the use of fecal samples to evaluate the gut microbiota should be included somewhere.

Response: We added a section discussing this aspect in the Background section (Lines 47-52).

7. A detailed description of the work carried out by each of the 28 authors should also be included, particularly as this is a very high number of authors for a Data Note of limited size and complexity.

Response: We have added a detailed description of the work (line281-287 in the revised manuscript) and removed some authors with fewer contributions. In addition Professor Karsten Kristiansen critically and extensively revised and modified the manuscript, and he is now included a co-author. The final list of authors is shown below:

Hudan Pan<sup>1,10</sup>, Ruijin Guo<sup>1,2,3,10</sup>, Jie Zhu<sup>2,3,10</sup>, Qi Wang<sup>2,3,6</sup>, Yanmei Ju<sup>2,3</sup>, Ying Xie<sup>1</sup>, Yanfang Zheng<sup>1,5</sup>, Zhifeng Wang<sup>2,3</sup>, Ting Li<sup>1</sup>, Zhongqiu Liu<sup>4</sup>, Linlin Lu<sup>4</sup>, Fei Li<sup>2,3,6</sup>, Bin Tong<sup>2,3</sup>, Liang Xiao<sup>2,3,7</sup>, Xun Xu<sup>2,3</sup>Runze Li<sup>1</sup>, Zhongwen Yuan<sup>1</sup>,Huanming Yang<sup>2,3</sup>, Jian Wang<sup>2,3</sup> , Karsten Kristiansen<sup>2,3,9</sup>, Huijue Jia<sup>1,2,3,8</sup> & Liang Liu<sup>1</sup>

Response to Reviewer #2:

General comment: In this manuscript, Pan and colleagues generated a gene set of Sprague-Dawley (SD) rat gut metagenome using 98 stool samples from 49 rats in 7 groups at 2 time-points. The reported set has ~ 5 million non-redundant genes and ~70% of the reads can be aligned to it. The rat gut metagenome catalogue was then compared to that of the mouse and the human gut metagenome catalogues at the phylum and genus levels. This is a useful resource and is of interest to many researchers but I have the following concerns:

Major concerns:

1) Why each sample was assembled alone? No justification is given for this approach. Would assembling all the samples at once produce better assembly (N50, number of genes, etc ..)?

Response: The 98 fecal samples, which produced high-quality reads for assembly, were collected from 49 SD rats at 2 time-points before and after treatment in 7 groups (as shown in Fig 1). A high sequence complexity was expected between pair-wised samples and across all groups. De novo assembly of each sample reduces assembly errors compared to a co-assembling strategy.

2) The authors use the following k-mers 27, 37, 47, 57, 67, 77, 87 and 97 for their assembly. Did the authors run optimizing trials and found those k-mers give the best assembly? Given that their paired-end reads are 50 bases, only three k-mers will be used for PE reads. Would using a lower "--mink" value produce better assembly?

Response: We apologize for this confusion. Actually, two types of reads, 100bp single-end reads and 50bp paired-end reads, were pooled to assemble longer contigs using parameter '-r pe.fa -l se.fa'(line134-137 in the revised manuscript ). A basic feature of IDBA-UD is the multi k-mer assembly approach which iterates k-mer values in our study from "--mink 27" to "--maxk 97 " by "--step 10" in order to stepwise improve the De-Bruijn graph and the resulting assembly. To balance the number and accuracy of

these assemblies, we adopted this series of k-mer values based on experience that the closest odd number larger or equal to half the average read length should be used.

3) Why pre-correction was not used in IDBA-UD assembly although it is used by IDBA-UD developer for metagenome assembly? Would including "--pre\_correction" in IDBA-UD enhances the assembly?

Response: We'd like to thank the Referee for this suggestion. We have now chose reads of 10 samples based on their N50 (5 samples from top rank and 5 samples from bottom rank) and re-assembled them independently by IDBA-UD with parameter "--pre\_correction". However, likely due to the sequencing depths our data is not extremely uneven, and we did not observe a significant difference in assembled indices. Please, consult the figure below.

Figure 1 Comparison of "--pre-correction" and "--no pre-correction" in IDBA-UD.

4) A PCA analysis is needed. It is important to know how the samples cluster based on gene counts and taxa counts.

Response: We would like to thank the Referee for this suggestion and we have added a new figure (see below) in the supplementary material as Fig.S1. The text (line 174-176), now reads "When accounting for the samples cluster based on gene counts and genus counts in the seven groups, a principal coordinates analysis (PCoA) of the abundance profiles at the level of gene or genera could not clearly separate the gut microbiome in the groups, except for the high fat diet group (Fig. S1)."

Figure 2 A PCoA of the 98 samples of the 7 groups at the gene (a) and the genus (b) levels.

5) Approximate 35% of the genes can't be assigned to any phyla and 47% of the genes can't be assigned to KEGG KOs. How many of those genes overlap (can't be assigned to phyla and can't be assigned to KOs)? Are those misassembled genes?

Response: In our study, we found that approximate 35% of the genes cannot be assigned to any phyla and 47% of the genes cannot be assigned to KEGG KOs. This is comparable to what has been observed for other published gut bacterial gene catalogs. In the rat catalog 1,380,083 genes cannot be assigned to either a KO or a phylum (shown in below). According to early studies which include Sanger sequencing, the misassembly rate was only 0.014 per kb (SOAPdenovo; Qin et al. 2010, Nature.). And by removing redundancy of genes from difference samples (CD-HIT, 95% identity, 90% overlap) com, the potential contribution from misassembly is further reduced. The relative high proportion of genes that cannot be assigned to any phyla or KEGG KOs probably relates to the incomplete coverage of gut microbial genes in the current reference genomes.

Figure 3 Genes that cannot be assigned to a phylum or a KO.

6) A comparison between the rat, mouse and human metagenome genes at the functional level using KEGG KOs, pathways and modules is needed.

Response: We have now included a comparison between the rat, mouse and human metagenome genes at the functional level using KEGG KOs as shown below and in the text Fig.6b.

Figure 4 Venn diagram of score KEGGs shared between the human (blue), mouse (yellow) and rat (green) gut microbiome catalogs.

7) What percentage of genes (not reads) overlap between rat, mouse and human?

Response: We have conducted an analysis determining the of overlap genes (not reads) between rat, mouse and human as shown below and in the text Fig.6a.

Figure 5 Venn diagram of genes shared by the human, mouse and rat catalogs.

8) The reported comparison with human metagenome gene catalogue uses a recent twin study. A comparison using the Human Microbiome project (HMP) gene catalogue is needed since the HMP is the golden standard in the field.

Response: The gene set identified in TwinsUK cohort were merged with the Integrated reference gene catalogue (ICG), leading to an updated gene catalogue containing 11.4 million genes from 1,517 fecal samples of 1,320 people around the world. We believe it is a more comprehensive resource for metagenomics studies on humans. So in this

|                                                                                                                                                                                                                                                                                                  |                                                                                                                                                                                                                                                                                                                                                                                                                                                                                                                                                                                                                                                                                                                                                                                                                                                                                                                                                                                                                                                                                                                                                                                                                                                                                                                                                                                                                                                                                                                                                                                                                                                                                                                                                                                                                                                                                                                                                                                                                                                                                                                                                                                                                                                                                                                                                                               |
|--------------------------------------------------------------------------------------------------------------------------------------------------------------------------------------------------------------------------------------------------------------------------------------------------|-------------------------------------------------------------------------------------------------------------------------------------------------------------------------------------------------------------------------------------------------------------------------------------------------------------------------------------------------------------------------------------------------------------------------------------------------------------------------------------------------------------------------------------------------------------------------------------------------------------------------------------------------------------------------------------------------------------------------------------------------------------------------------------------------------------------------------------------------------------------------------------------------------------------------------------------------------------------------------------------------------------------------------------------------------------------------------------------------------------------------------------------------------------------------------------------------------------------------------------------------------------------------------------------------------------------------------------------------------------------------------------------------------------------------------------------------------------------------------------------------------------------------------------------------------------------------------------------------------------------------------------------------------------------------------------------------------------------------------------------------------------------------------------------------------------------------------------------------------------------------------------------------------------------------------------------------------------------------------------------------------------------------------------------------------------------------------------------------------------------------------------------------------------------------------------------------------------------------------------------------------------------------------------------------------------------------------------------------------------------------------|
|                                                                                                                                                                                                                                                                                                  | <p>study, we used the human metagenome gene catalogue in as reported in the TwinsUK cohort rather than the Human Microbiome project (HMP) gene catalog.</p> <p>Minor concerns:</p> <p>1) Figure 2: figure colors don't match the description given in figure legend. Human in the legend is red but shown as light blue in the figure.<br/>Response: We have revised the description in figure legend (line 179 in the revised manuscript). Thanks for the comment.</p> <p>2) Figure 5 legend, change white to yellow in: "Yellow: the area of white reflects unknown function annotation"<br/>Response: We have revised the figure legend (line 205 in the revised manuscript).</p> <p>3) Include a table linking EBI sample IDs to sample IDs shown in supplemental data.<br/>Response: We have added a table linking EBI sample IDs shown in supplemental data. Thanks for your suggestion.</p> <p>4) Define MTX, GJK and ZQFTN.<br/>Response: We have described MTX, GJK and ZQFTN in the revised manuscript (line 96-99 in the revised manuscript). The section now reads "MTX is a widely used disease-modifying anti-rheumatic drug. GJK is a Chinese experimental herb formula and ZQFTN is a monomer drug derived from the Chinese traditional herb-Caulis Sinomenii. These three drugs have been used in China for RA therapy for a long time with good effectiveness."</p> <p>5) There are many typos in the manuscript that need to be addressed, for example, "that" in: "It is still unknown that how colonies of microbiota are established and changed". A careful round of editing is needed.<br/>Response: The manuscript has been extensively modified and revised.</p> <p>We hope the above our responses and the revised manuscript address the comments and suggestions from the reviewers and we hope that the revised manuscript now is acceptable for publication in GigaScience. We are looking forward to hearing from you.</p> <p>Yours sincerely,</p> <p>Liang Liu</p> <hr/> <p>Prof. Liang Liu, MD., Ph.D.<br/>President and Chair Professor of Macau University of Science and Technology,<br/>Director of the State Key Laboratory of Quality Research in Chinese Medicine,<br/>Macau University of Science and Technology<br/>Taipa, Macau, China.<br/>Tel: +853-8897 2238<br/>Fax: + 853-2882 3312<br/>E-mail Address: lliu@must.edu.mo</p> |
| <b>Additional Information:</b>                                                                                                                                                                                                                                                                   |                                                                                                                                                                                                                                                                                                                                                                                                                                                                                                                                                                                                                                                                                                                                                                                                                                                                                                                                                                                                                                                                                                                                                                                                                                                                                                                                                                                                                                                                                                                                                                                                                                                                                                                                                                                                                                                                                                                                                                                                                                                                                                                                                                                                                                                                                                                                                                               |
| <b>Question</b>                                                                                                                                                                                                                                                                                  | <b>Response</b>                                                                                                                                                                                                                                                                                                                                                                                                                                                                                                                                                                                                                                                                                                                                                                                                                                                                                                                                                                                                                                                                                                                                                                                                                                                                                                                                                                                                                                                                                                                                                                                                                                                                                                                                                                                                                                                                                                                                                                                                                                                                                                                                                                                                                                                                                                                                                               |
| Are you submitting this manuscript to a special series or article collection?                                                                                                                                                                                                                    | No                                                                                                                                                                                                                                                                                                                                                                                                                                                                                                                                                                                                                                                                                                                                                                                                                                                                                                                                                                                                                                                                                                                                                                                                                                                                                                                                                                                                                                                                                                                                                                                                                                                                                                                                                                                                                                                                                                                                                                                                                                                                                                                                                                                                                                                                                                                                                                            |
| <b>Experimental design and statistics</b>                                                                                                                                                                                                                                                        | Yes                                                                                                                                                                                                                                                                                                                                                                                                                                                                                                                                                                                                                                                                                                                                                                                                                                                                                                                                                                                                                                                                                                                                                                                                                                                                                                                                                                                                                                                                                                                                                                                                                                                                                                                                                                                                                                                                                                                                                                                                                                                                                                                                                                                                                                                                                                                                                                           |
| Full details of the experimental design and statistical methods used should be given in the Methods section, as detailed in our <a href="#">Minimum Standards Reporting Checklist</a> . Information essential to interpreting the data presented should be made available in the figure legends. |                                                                                                                                                                                                                                                                                                                                                                                                                                                                                                                                                                                                                                                                                                                                                                                                                                                                                                                                                                                                                                                                                                                                                                                                                                                                                                                                                                                                                                                                                                                                                                                                                                                                                                                                                                                                                                                                                                                                                                                                                                                                                                                                                                                                                                                                                                                                                                               |

|                                                                                                                                                                                                                                                                                                                                                                                                                                                                                                                                                         |            |
|---------------------------------------------------------------------------------------------------------------------------------------------------------------------------------------------------------------------------------------------------------------------------------------------------------------------------------------------------------------------------------------------------------------------------------------------------------------------------------------------------------------------------------------------------------|------------|
| <p>Have you included all the information requested in your manuscript?</p>                                                                                                                                                                                                                                                                                                                                                                                                                                                                              |            |
| <p><b>Resources</b></p> <p>A description of all resources used, including antibodies, cell lines, animals and software tools, with enough information to allow them to be uniquely identified, should be included in the Methods section. Authors are strongly encouraged to cite <a href="#">Research Resource Identifiers</a> (RRIDs) for antibodies, model organisms and tools, where possible.</p> <p>Have you included the information requested as detailed in our <a href="#">Minimum Standards Reporting Checklist</a>?</p>                     | <p>Yes</p> |
| <p><b>Availability of data and materials</b></p> <p>All datasets and code on which the conclusions of the paper rely must be either included in your submission or deposited in <a href="#">publicly available repositories</a> (where available and ethically appropriate), referencing such data using a unique identifier in the references and in the “Availability of Data and Materials” section of your manuscript.</p> <p>Have you have met the above requirement as detailed in our <a href="#">Minimum Standards Reporting Checklist</a>?</p> | <p>Yes</p> |

# A gene catalogue of the Sprague-Dawley rat gut metagenome

Hudan Pan<sup>1,10</sup>, Ruijin Guo<sup>1,2,3,10</sup>, Jie Zhu<sup>2,3,10</sup>, Qi Wang<sup>2,3,6</sup>, Yanmei Ju<sup>2,3</sup>, Ying Xie<sup>1</sup>, Yanfang Zheng<sup>1,5</sup>, Zhifeng Wang<sup>2,3</sup>, Ting Li<sup>1</sup>, Zhongqiu Liu<sup>4</sup>, Linlin Lu<sup>4</sup>, Fei Li<sup>2,3,6</sup>, Bin Tong<sup>2,3</sup>, Liang Xiao<sup>2,3,7</sup>, Xun Xu<sup>2,3</sup>, Runze Li<sup>1</sup>, Zhongwen Yuan<sup>1</sup>, Huanming Yang<sup>2,3</sup>, Jian Wang<sup>2,3</sup>, Karsten Kristiansen<sup>2,3,9</sup>, Huijue Jia<sup>1,2,3,8</sup> & Liang Liu<sup>1</sup>

<sup>1</sup>State Key Laboratory of Quality Research in Chinese Medicine/Macao Institute for Applied Research in Medicine and Health, Macao University of Science and Technology, Macao, China

<sup>2</sup>BGI-Shenzhen, Shenzhen 518083, China

<sup>3</sup>China National Genebank, BGI-Shenzhen, Shenzhen 518120, China

<sup>4</sup>International Institute for Translational Research of Traditional Chinese Medicine of Guangzhou University of Chinese Medicine, Guangzhou, Guangdong 510006, China

<sup>5</sup>Fujian University of Traditional Chinese Medicine, No.1, Qiuyang Road, Minhoushangjie, Fuzhou, Fujian 350122, China

<sup>6</sup>BGI Education Center, University of Chinese Academy of Sciences, Shenzhen 518083, China

<sup>7</sup>Shenzhen Engineering Laboratory of Detection and Intervention of human intestinal microbiome, BGI-Shenzhen, Shenzhen 518083, China

<sup>8</sup>Shenzhen Key Laboratory of Human Commensal Microorganisms and Health Research, BGI-Shenzhen, Shenzhen 518083, China

<sup>9</sup>Laboratory of Genomics and Molecular Biomedicine, Department of Biology, University of Copenhagen, 2100 Copenhagen, Denmark

<sup>10</sup>These authors contributed equally to this work.

Correspondence and requests for materials should be addressed to Liang Liu ([lliu@must.edu.mo](mailto:lliu@must.edu.mo)) or Huijue Jia ([jiahuijue@genomics.cn](mailto:jiahuijue@genomics.cn))

1       28    **Abstract**

2  
3       29    **Background:** Laboratory rats such as the Sprague-Dawley (SD) rats are an important model for  
4  
5  
6       30    biomedical studies in relation to human physiological or pathogenic processes. Here we report the first  
7  
8  
9       31    catalog of microbial genes in fecal samples from Sprague-Dawley rats.

10  
11       32    **Findings:** The catalog was established using 98 fecal samples from 49 SD rats, divided in 7  
12  
13  
14       33    experimental groups, and collected at different time points 30 days apart. The established gene catalog  
15  
16  
17       34    comprises 5,130,167 non-redundant genes with an average length of 750 base pairs (BP), among which  
18  
19  
20       35    64.6% and 26.7% were annotated to phylum and genus levels, respectively. Functionally, 53.1%, 21.8%  
21  
22       36    and 31% of the genes could be annotated to KEGG orthologous groups (KOs), modules and pathways,  
23  
24  
25       37    respectively.

26  
27  
28       38    **Conclusions:** A comparison of rat gut metagenome catalogue with human or mouse revealed a higher  
29  
30  
31       39    pairwise overlap between rats and humans (2.47%) than between mice and humans (1.19%) at the gene  
32  
33  
34       40    level. 97% of the functional pathways in the human catalog were present in the rat catalogue  
35  
36  
37       41    underscoring the potential use of rats for biomedical research.

38  
39       42    **Background**

40  
41  
42       43    The gut microbiota residing in the human colon is a complex ecological community, which is crucial  
43  
44  
45       44    for a multitude of biological processes [1, 2]. Detailed analyses of the gut microbiota using next  
46  
47  
48       45    generation sequencing technologies have provided a large amount of information on the composition  
49  
50  
51       46    and gene content of the human gut microbiota and led to the identification of changes associated with a  
52  
53       47    number of human diseases [3-5], the identification of gut microbial markers of importance for early  
54  
55       48    non-invasive diagnosis [6], and even prediction of therapeutic outcomes [7, 8] Even though the fecal  
56  
57  
58       49    microbiota differs from the microbiota in the upper parts of the digestive tract, fecal samples represent



1 50 an available proxy for the microbiota in other locations of the gut, and the potential in relation to using  
2  
3 51 signatures or markers of the fecal microbiota for diagnosis and stratification of patients clearly warrants  
4  
5  
6 52 further studies including the use of well characterized animal models as well as critical evaluations of  
7  
8  
9 53 the possible use of metagenomic analyses of human fecal samples for use in the clinics[9]. Studies of  
10  
11  
12 54 host-microbe interactions in humans have limitations in terms of collection of tissue samples and  
13  
14  
15 55 experimental protocols. Thus, comprehensive animal studies are essential for gaining more knowledge  
16  
17  
18 56 of the importance and function of the gut microbiota, for understanding host-microbiota interactions,  
19  
20 57 and for pre-clinical studies [10, 11].  
21

22 58 Rheumatoid arthritis (RA) is a devastating immune disorder with poorly defined etiologies and no  
23  
24  
25 59 curative treatments[12]. Cross-sectional studies have revealed perturbations of the oral and the gut  
26  
27  
28 60 microbial communities in RA patients which were partly reversed after treatment [5] and probiotic  
29  
30  
31 61 supplementation also shows an improvement in RA therapy[7], indicating that microbiota has closely  
32  
33  
34 62 correlation in the occurrence, progression and treatment of RA. Animal models such as  
35  
36  
37 63 adjuvant-induced arthritis (AIA), one of the most widely accepted animal models [13-16], may provide  
38  
39  
40 64 new knowledge on the relationship between the microbiota and RA and possibly contribute to the  
41  
42 65 development of novel microbial-based drugs.  
43

44 66 The rat (*Rattus norvegicus*) is one of the most widely and frequently used laboratory animal. Germ-free  
45  
46  
47 67 (GF) rats have been used to explore host-microbiota interactions and examine possible roles of the  
48  
49  
50 68 microbiota in relation to metabolic disorders [16], replantation [17], inflammatory responses [18] and  
51  
52  
53 69 immune processes [19]. However, GF rodents are immune compromised, and thus, the use of GF  
54  
55  
56 70 animals in preclinical work does not directly mimic the human condition. Sprague-Dawley (SD) is one  
57  
58  
59 71 of the most widely used outbred rats in biomedical research, known for its genetic variability. It is  
60  
61  
62  
63  
64  
65

1 72 extensively used to develop animal models of human conditions such as diabetes [17], obesity[18],  
2  
3 73 cancer[19], cardiovascular diseases[20] and adjuvant-induced arthritis could also be induced in SD rats.  
4  
5  
6 74 To enable more comprehensive studies of the development and the function of the gut microbiota,  
7  
8  
9 75 detailed catalogs of the gut microbial genes are needed.  
10  
11 76 The gut microbiota profile of SD rats has been found to be more similar to that of humans than the  
12  
13  
14 77 microbiota profile of mice using 16S rRNA gene amplicon sequencing[21]. Here, we collected fecal  
15  
16  
17 78 samples from SD rats to establish a gut microbial gene catalog using BGISEQ-500-based  
18  
19  
20 79 whole-metagenome shotgun sequencing for the first time. As the composition of the microbiota varies  
21  
22  
23 80 markedly with age, diet and immune environment, we include information on these different factors to  
24  
25  
26 81 provide a useful reference for future studies including research on AIA arthritis using SD rat animal  
27  
28 82 model.

### 31 **Ethics statement**

32  
33  
34 84 All experimental procedures were performed in accordance to institutional guidelines for the care and  
35  
36  
37 85 use of laboratory animals in China, and experimental procedures were strictly in accordance with the  
38  
39  
40 86 guidelines for the care and use of laboratory animals (National Research Council of USA, 1996). This  
41  
42  
43 87 study was approved by the Institutional Review Board on Bioethics and Biosafety (Reference number:  
44  
45 88 BGI-FT 16090).

### 47 **Data description**

48  
49  
50 90 Forty-nine male SD rats, 4 weeks of age, and weighing approximately 60 g were purchased from  
51  
52  
53 91 Guangdong Medical Laboratory Animal Center (Guangzhou, China). The rats were randomly divided  
54  
55  
56 92 into 7 groups of 7 rats using a random number table. The groups were: a reference group fed a regular  
57  
58  
59 93 (low fat) chow, reference group of AIA rats, a group of AIA rat receiving *Lactobacillus casei* (*L.casei*)

1 94 (2\*10<sup>8</sup> CFU/day), a group of AIA rat receiving methotrexate (MTX, 7.6mg/kg/week), a group of AIA  
2  
3 95 rat receiving GJK (24g/kg/d), a group of AIA rat receiving ZQFTN (50mg/kg/d). The latter 5 groups  
4  
5  
6 96 were all fed the regular (low fat) chow. In addition, a group of AIA rat fed a high fat diet (D12492). All  
7  
8  
9 97 groups had access to feed and water ad libitum. The rats were maintained in individually ventilated  
10  
11 98 cages (IVC) at 25 °C with a humidity of 55% and a 12 h/12 h light/dark cycle. MTX is a widely used  
12  
13 99 disease-modifying anti-rheumatic drug[22]. GJK is a Chinese experimental herb formula[23] and  
14  
15  
16 100 ZQFTN is a monomer drug derived from the Chinese traditional herb-*Caulis Sinomenii*[24]. These  
17  
18  
19 101 three drugs have been used in China for RA therapy for a long time with good effectiveness. The rats  
20  
21  
22 102 were acclimated for 14 days to adapt to the laboratory environment before AIA. On day 0 of the  
23  
24  
25 103 experience, we collected fecal samples from the all rats and subsequently AIA treatment was instigated  
26  
27  
28 104 by a single subcutaneous injection of 0.1 mL of complete Freund's adjuvant (CFA) containing 0.2mg of  
29  
30  
31 105 *Mycobacterium tuberculosis* (MT) H37Ra (BD, Sparks, USA), and mineral oils [Sigma-Aldrich, USA]  
32  
33  
34 106 into the root of rat tail[15]. An equal volume of saline was injected into the reference groups. From day  
35  
36  
37 107 0 to day 30, rats were gavaged daily with *L.casei* (2\*10<sup>8</sup> CFU/day), with MTX (7.6mg/kg/week), with  
38  
39 108 GJK (24g/kg/d) or ZQFTN (50mg/kg/d). The regular (low fat) chow reference group, the AIA (low fat)  
40  
41  
42 109 chow group and the AIA high fat diet group were given 0.3% CMC-Na. Body weights were determined  
43  
44  
45 110 every three days (**Table S1**). On day 7, 14, 21 and day 30, we collected fecal samples from all rats and  
46  
47  
48 111 the rats were sacrificed on day 30 by cervical dislocation. All the collected fecal samples were  
49  
50  
51 112 immediately placed into drikold for preservation.  
52  
53 113 The experimental setup and collection of fecal samples are shown in **Fig.1**. We used the 98 fecal  
54  
55  
56 114 samples collected on day 0 and day30 to establish the reference gene catalog and the remaining 147  
57  
58  
59 115 samples to assess the quality of the established gene set.  
60  
61  
62  
63  
64  
65

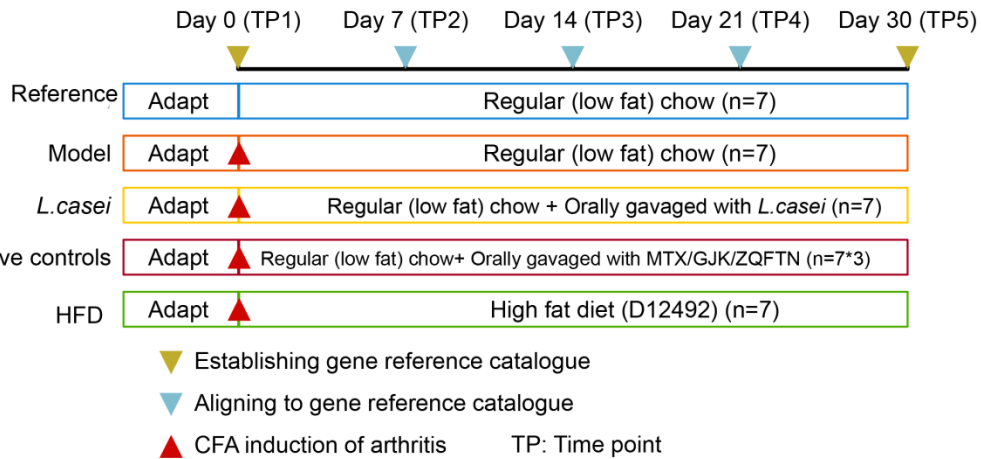

116

117 **Figure 1. Experimental setup and fecal samples for establishment and assessment the gene**

118 **catalog of the gut microbiome in SD rats.** Forty-nine SD rats were grouped into seven groups

119 comprising a reference group (n=7) fed a regular (low fat) chow, a group of AIA rats treated with

120 vehicle (n=7), a group of AIA rats gavaged with *L.casei* (n=7), a group of AIA rats gavaged with

121 MTX (n=7), a group of AIA rats gavaged with GJK (n=7) or ZQFNT (n=7) and a group of AIA rats

122 fed a high fat diet group (D12492)(n=7). Arthritis was induced by injection of complete Freund's

123 adjuvant (CFA) on Day 0 after fecal samples collection and fecal samples were collected for 5

124 time points (TP) on Day 0 (TP1), Day 7 (TP2), Day 14 (TP3), Day 21 (TP4) and Day 30 (TP5).

125 **DNA extraction**

126 Fecal samples were thawed on ice and DNA extraction was performed using the QIAamp<sup>®</sup> DNA Stool

127 Mini Kit (Qiagen, Valencia, CA, USA). Extracts were treated with DNase-free RNase to eliminate

128 RNA contamination. DNA quantity was determined using a Qubit 3.0 fluorometer with the Quant-iT<sup>™</sup>

129 dsDNA BR Assay Kit. The integrity of DNA was evaluated by gel electrophoresis [25].

130 **Library construction and sequencing**

131 We constructed sequencing library following the BGISEQ-500 instruction and using the standard

132 protocol with minor modification [26]. In brief, the genomic DNA was fragmented and DNA fragments

1  
2  
3  
4  
5  
6  
7  
8  
9  
10  
11  
12  
13  
14  
15  
16  
17  
18  
19  
20  
21  
22  
23  
24  
25  
26  
27  
28  
29  
30  
31  
32  
33  
34  
35  
36  
37  
38  
39  
40  
41  
42  
43  
44  
45  
46  
47  
48  
49  
50  
51  
52  
53  
54  
55  
56  
57  
58  
59  
60  
61  
62  
63  
64  
65

1 133 between 100 base pairs (bp) and ~300 bp were selected. The selected DNA fragments were repaired  
2  
3 134 and modified. A dTTP tailed adapter sequence was ligated to both ends of the DNA fragments and the  
4  
5  
6 135 fragments were further amplified and subjected single-strand circularization.  
7  
8  
9 136 Two types of sequencing strategies, paired-end (PE) and single-end (SE), were followed using the  
10  
11 137 BGISEQ-500 platform with read length of 50 bp and 100 bp respectively (insert size ~250bp). In total,  
12  
13  
14 138 we generated 12,621,796,886 reads of PE50 and 11,654,248,439 reads of SE100, representing 2,512.6  
15  
16  
17 139 Gb of raw data (**Table S2, Table S3**).

#### 20 140 **Data preprocessing**

22 141 High quality reads will improve performance of metagenomic assembly [27]. To remove or trim low  
23  
24  
25 142 quality reads we used our in-house Perl script [28] and the quality was assessed by Phred quality score.

28 143 The following steps were performed:

31 144 (i) Reads containing more than 3 'N' bases were removed;

34 145 (ii) Contiguous bases counted from 3'-end of a read, with quality value lower than 20 were trimmed;

36 146 (iii) After step i and ii, the reads with a minimum length of 90bp and of 40nt for SE reads and PE reads,  
37  
38  
39 147 respectively, were kept.

42 148 As expected, a large proportion of BGISEQ-500 generated sequences, 95.93% ~ 98.80% and 96.47% ~  
43  
44 149 98.61% for SE100 and PE50 reads, respectively, remained as high-quality reads. Further, we aligned  
45  
46  
47 150 clean reads to host genomics DNA (NCBI accession no. NC\_005100) used SOAP aligner v2.22 and an  
48  
49  
50 151 average 9.76% clean reads of SE100 and 11.2% clean reads of PE50 corresponding to host(rat) genome  
51  
52  
53 152 were removed. Thus, we obtained a total of high-quality data corresponding to 1,689.24Gb for  
54  
55  
56 153 SE100and 534.69 Gb for PE50, with an average of 5.21 Gb per sample (**Table S2, Table S3**) [28, 29].

#### 58 154 **Metagenomics sequences de novo assembly**

1 155 High-quality reads from each DNA samples of Day 0 and Day 30 were selected for de novo assembly  
2  
3  
4 156 of each sample. We merged high-quality reads of PE50 and SE100 from each sample and assembled  
5  
6 157 them into longer contigs using the IDBA-UD(v1.1.3) by iterated Kmer[30]. Contigs constructed at each  
7  
8  
9 158 round of iteration were used as long-reads for the next iteration with following command line:

10  
11  
12 159 `idba_ud -r pe.fa -l se.fa --mink 27 --maxk 97 --step 10 -o out_dir --num_threads 24`  
13

14 160 A total of 67.67% of the reads were assembled into ~22.9 million contigs with N50 of 5.36Kb, giving a  
15  
16  
17 161 total contig length of ~32.3Gb (**Table S2**).

## 18 19 20 162 **Establishment of a gene catalog of the SD rat gut microbiome**

21  
22 163 Before performing gene prediction, we filtered the assembled sequences of each of the 98 samples  
23  
24  
25 164 selecting only contigs with a length exceeding 500 bases. These contigs were used for prediction of  
26  
27  
28 165 open reading frames (ORFs) using the Prodigal (v2.6.1) with procedure ‘meta’[31]. In order to bin  
29  
30  
31 166 orthologues and avoid inflation of possible sequencing errors, we grouped shared ORFs using CD-HIT  
32  
33  
34 167 with a criterion of 95% identity over 90% of the shorter ORF length with default parameter except “-G  
35  
36 168 0 -n 8 -aS 0.9 -c 0.95 -d 0 -g 1”[32]. The longest ORF in each group was selected to represent the  
37  
38  
39 169 group and other members of the group were considered redundant.

40  
41  
42 170 ORFs with a length of less than 100bp were removed yielding a non-redundant gene set containing  
43  
44  
45 171 5,130,167 ORFs with an average length of 750 bp. To assess the representation of the SD rat gut  
46  
47  
48 172 microbiome in the non-redundant gene set, we aligned the ORFs against the SE100 reads from all the  
49  
50  
51 173 245 samples in 7 groups across the five collection time-points, using SOAPaligner2 with a 90%  
52  
53 174 identity threshold. A total of 69.5% of reads could be mapped to our gene set and these reads were  
54  
55  
56 175 employed to compute the relative abundance of each gene in our catalogue (**Fig. 2, Table S3**).

57  
58 176 When accounting for the samples cluster based on gene counts and genus counts in the seven groups, a  
59  
60  
61  
62  
63  
64  
65

177 principal coordinates analysis (PCoA) of the abundance profiles at the level of gene or genera could not  
178 clearly separate the gut microbiome in the groups, except for the high fat diet group (**Fig. S1**).

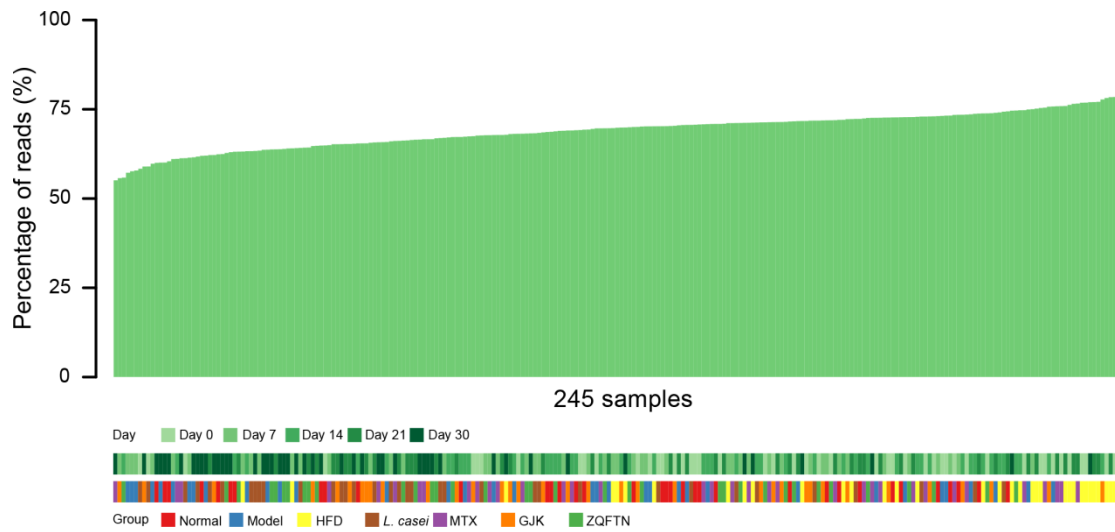

179 **Figure 2. The gene catalog of the gut microbiome in SD rats.** Percentage of total reads in this study  
180 (n=245 samples) that could be mapped to gene catalogues of the gut microbiome in rat (green).  
181 Collection time and groups of the samples are shown for reference.

### 183 Gene richness

184 For a given number of samples at Day0 or Day30, we calculated the total number of identified gene  
185 after 100 random samplings with replacement. The rarefaction analysis revealed a curve approaching  
186 saturation, suggesting that our gene set included most of gut bacterial genes in the SD rat (**Fig. 3**).  
187 Notably, samples at Day30 had higher gene count than samples at Day0 (**Fig. 3**). The Chao 2 index was  
188 92.96%.

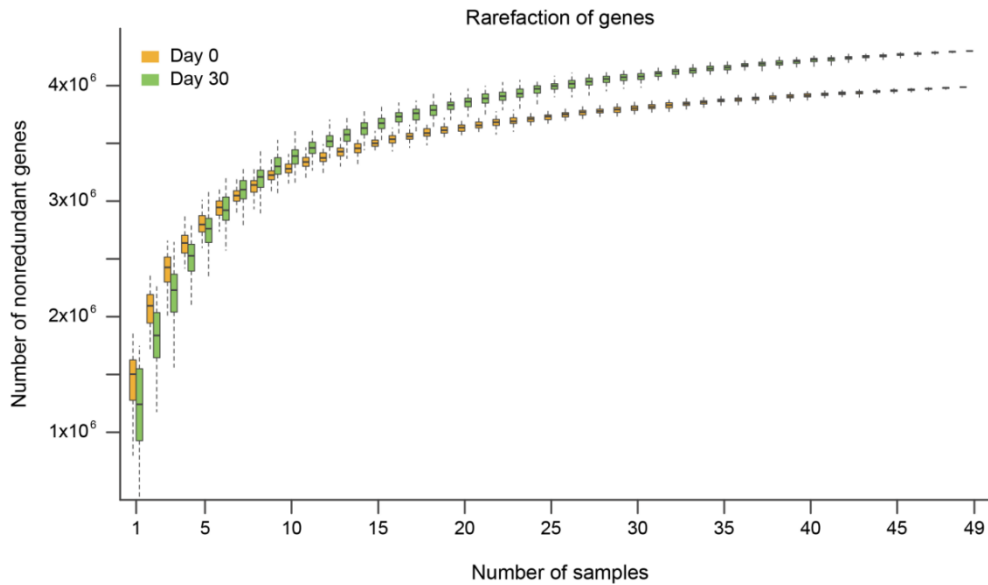

189

190 **Figure 3. Rarefaction of genes in fecal samples on day 0 and day 30.** The number of  
 191 non-redundant genes were detected along with the increasing numbers of samples (n=49 for each  
 192 time point). Yellow: fecal samples from 49 SD rats on day 0; Green: fecal samples from 49 SD  
 193 rats on day 30.

194 **Taxonomic assignment**

195 Taxonomic assignment of the predicted genes performed using the NCBI-NR database and Integrated  
 196 Microbial Genomes (IMG, v400) database using an in-house pipeline detailed previously[25].Of the  
 197 5,130,167 genes, 64.6% and 26.7% were annotated to the phylum and genus levels, respectively, while  
 198 only 9% were annotated to the species level (**Fig. 4**). At the phylum level, most of the annotated genes  
 199 belonged to Firmicutes (75.90%), followed by Bacteroidetes (10.83%) and Proteobacteria (6.77%)(**Fig.**  
 200 **4**). At the genus level, the annotated genes (5.30%) primarily belong to *Clostridium* (8.74%), followed  
 201 by *Bacteroides* (6.25%), *Roseburia* (4.75%), *Ruminococcus* (4.44%) and *Lachnoclostridium* (2.58%),  
 202 reflecting the paucity of the sequenced rat gut bacterial genomes (**Fig. 4**).

1  
2  
3  
4  
5  
6  
7  
8  
9  
10  
11  
12  
13  
14  
15  
16  
17  
18  
19  
20  
21  
22  
23  
24  
25  
26  
27  
28  
29  
30  
31  
32  
33  
34  
35  
36  
37  
38  
39  
40  
41  
42  
43  
44  
45  
46  
47  
48  
49  
50  
51  
52  
53  
54  
55  
56  
57  
58  
59  
60  
61  
62  
63  
64  
65



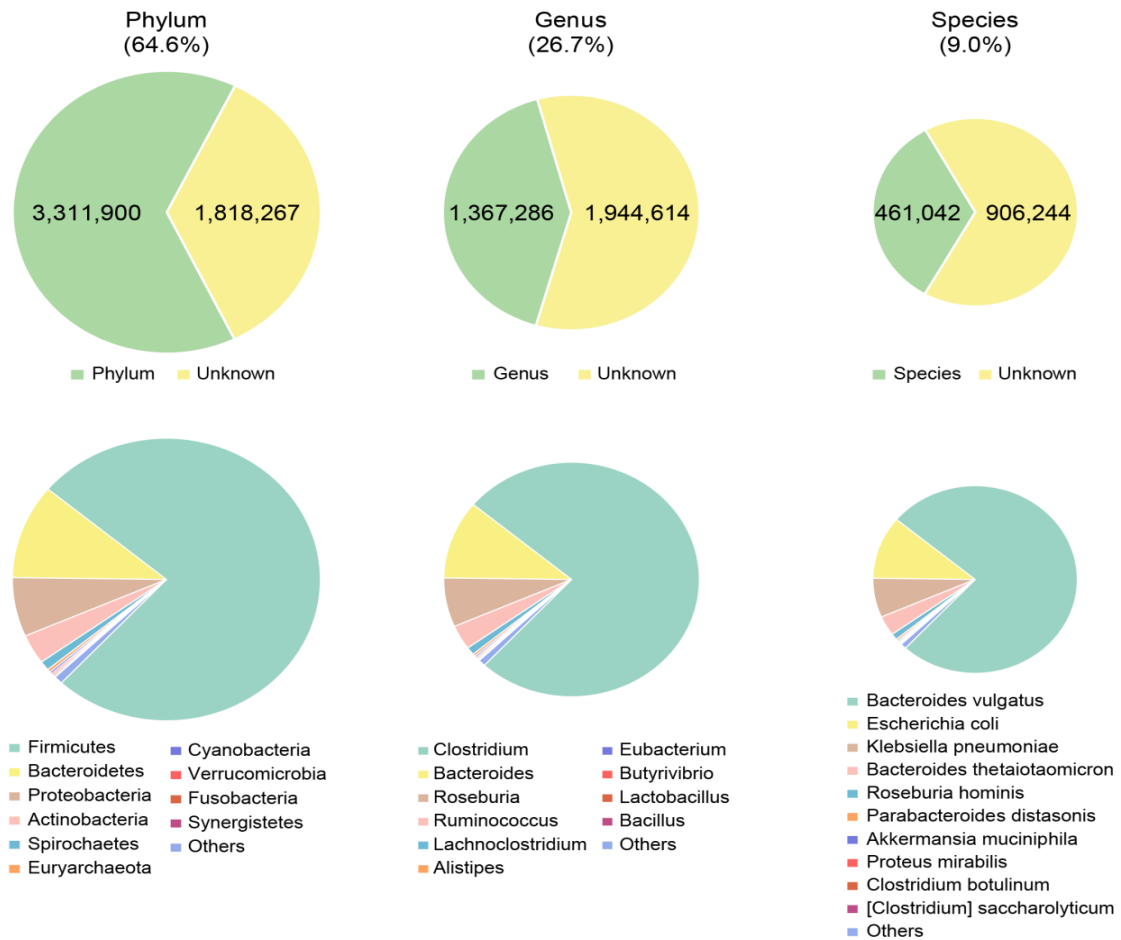

203

204 **Figure 4. Annotation of the non-redundant genes to phyla, genera and species.** The numbers

205 of non-redundant genes that could be annotated to a phyla, genera and species are shown with the

206 numbers are shown. The green area reflects the proportion of genes that could be annotated to a

207 phylum, genus and species. The yellow area reflects unannotated genes. The identity of phyla,

208 genera and species harboring the annotated genes is displayed below the pie charts.

209 **Gene functional classification**

210 Putative amino acid sequences were translated from the gene catalogue and searched against the

211 proteins /domains in the KEGG database (release v79.0, with animal and plant genes removed) using

212 BLASTP v2.2.26, with the default parameters except “-m 8 -e 1e-5 -F F -a 6 -b 50”. Each protein was

213 assigned to a KEGG homologues by the highest scoring annotated hit(s) containing at least on

214 high-scoring segment pair(HSP) scoring over 60 bits.

1  
2  
3  
4  
5  
6  
7  
8  
9  
10  
11  
12  
13  
14  
15  
16  
17  
18  
19  
20  
21  
22  
23  
24  
25  
26  
27  
28  
29  
30  
31  
32  
33  
34  
35  
36  
37  
38  
39  
40  
41  
42  
43  
44  
45  
46  
47  
48  
49  
50  
51  
52  
53  
54  
55  
56  
57  
58  
59  
60  
61  
62  
63  
64  
65

215 Functionally, 53.1%, 21.8% and 31% of the genes could be annotated to KEGG orthologous groups  
 216 (KOs), modules and pathways, respectively (**Fig. 5**). Among these, we noted metabolic functions  
 217 including pathways or modules involved in carbohydrates, amino acid, and energy metabolism;  
 218 environmental information processing including membrane transport pathways or modules and genetic  
 219 information processing including replication and repair, translation and transcription (Table S4,S5) .

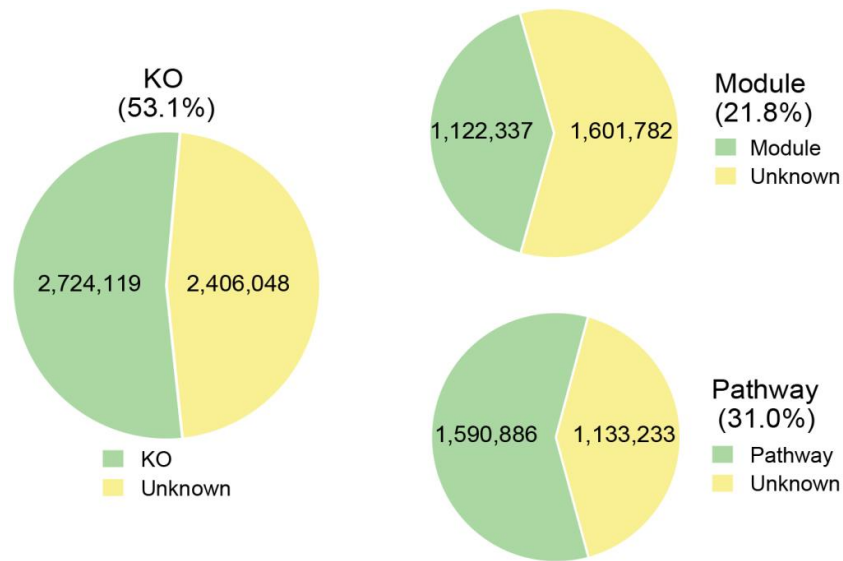

220  
 221 **Figure 5. Annotation of non-redundant genes to KOs, modules and pathways.** KO: Kyoto  
 222 Encyclopedia of Genes and Genomes orthologous groups (KOs). The numbers of non-redundant  
 223 genes that could be annotated to KOs, modules and pathways are shown. The size of green area  
 224 reflects the proportion of the genes that could be annotated to KOs, modules and pathways. The  
 225 yellow area reflects the proportion of functionally unannotated genes.

226 **Comparison of human, mouse, rat gene catalogue**

227 The rat gut microbial gene catalog was compared to the mouse and the integrated human gut microbial  
 228 gene catalogs. Only a low percentages of the genes are shared between the rat, human and mouse  
 229 catalogs. 1.29% of the genes in the rat gut microbiota, 0.58% of the genes in the human gut microbiota  
 230 and f the genes in the mouse gut microbiota are shared by all three species. The pairwise overlap at the

1 231 gene level is also modest (rat versus human, 278,685 genes; rat versus mouse 556,990 genes; and  
2  
3 232 mouse versus human 145,534 genes) (Fig. 6a), but was substantially higher for rats and humans (2.47%)  
4  
5  
6 233 than for mice and humans (1.19%). Based on a 90% inter-individual sharing within each animal species,  
7  
8  
9 234 a large proportion of KEGG orthology (KO) functions is shared (3,138 KO identifiers) at the functional  
10  
11 235 level between rat, mouse and human (Fig. 6b), representing a functional core in these three mammals.  
12  
13  
14 236 Of note rats shared more KO identifiers with human than mice.  
15  
16  
17 237 To further compare the SD rat gut metagenome catalogue with the mouse and the human gut  
18  
19  
20 238 metagenome catalogues, we also aligned all the SE100 reads of the 245 samples to their non-redundant  
21  
22 239 gene set of microbial gene in the human and the mouse gut containing ~11.4 million and ~ 2.6 million  
23  
24  
25 240 genes, respectively[33, 34]. An average of 20.45% and 25.41% of the reads of the SD rats mapped to  
26  
27  
28 241 the non-redundant gene sets of the mouse and human gut microbiome, respectively (**Table S6**). By  
29  
30  
31 242 contrast, as shown in Fig.2 and Table S3 we observed a much higher mapping ratio of the reads of the  
32  
33  
34 243 245 samples to non-redundant gene set SD rat, with a mapping average of 69.5, confirming the utility  
35  
36 244 of this reference (**Table S6**).  
37  
38  
39 245 We compared the percentage of genes assigned the top 6 phyla and genera in the three catalogs.  
40  
41  
42 246 Interestingly, the ratios of Firmicutes and Bacteroidetes we observed at the phylum level are similar to  
43  
44  
45 247 those found in mice, but markedly different from the human microbiome (**Fig. 6c,d**).  
46  
47  
48  
49  
50  
51  
52  
53  
54  
55  
56  
57  
58  
59  
60  
61  
62  
63  
64  
65

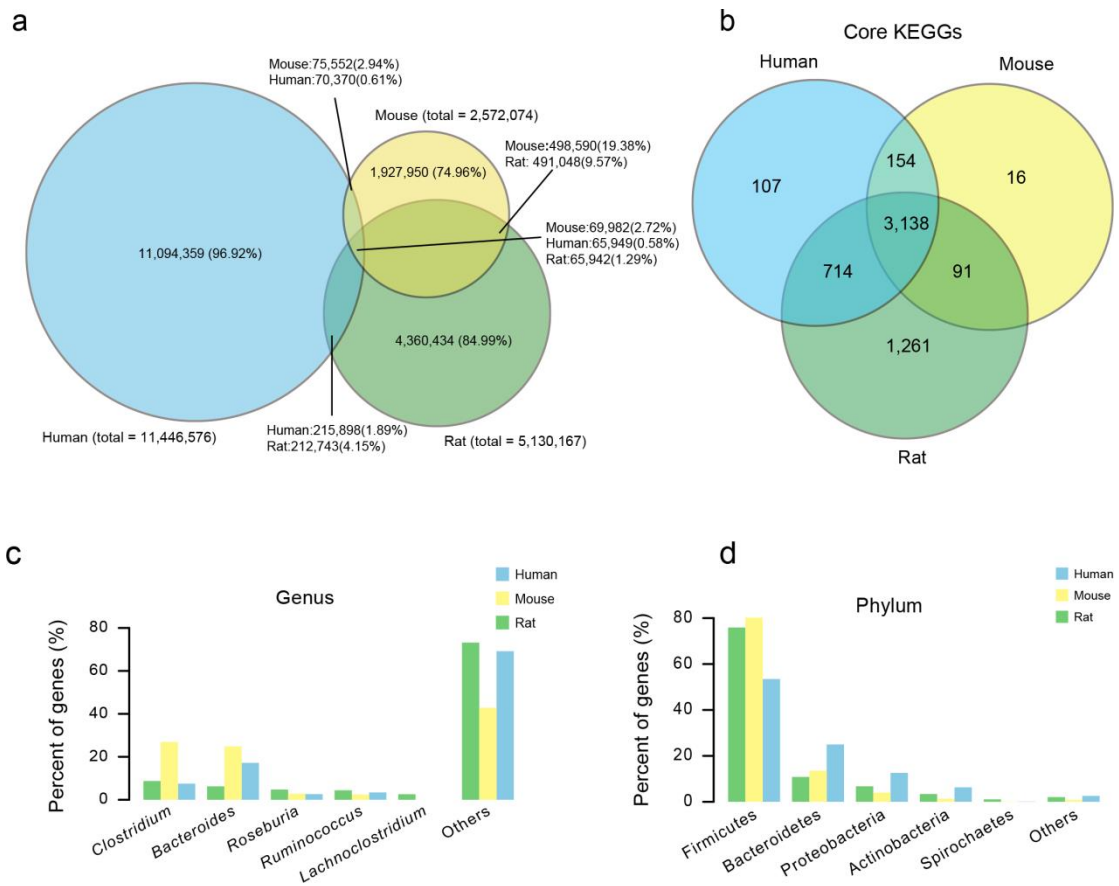

248

249 **Figure 6. Comparison of the gut microbiome gene catalogs of human, mouse and rat. (a)** Venn

250 diagram of non-redundant genes shared between human (blue), mouse (yellow) and rat (green) gut

251 microbiome catalogs. **(b)** Venn diagram of KO functions shared by the human, mouse and rat

252 microbiota. **(c)** Percentage of genes in genera including *Clostridium*, *Bacteroides*, *Roseburia*,

253 *Ruminococcus*, *Lachnospirillum* in the gut microbial gene catalogs of rat, human and mouse. **(d)** The

254 percentages of genes assigned to Firmicutes, Bacteroidetes, Proteobacteria, Actinobacteria, Spirochaetes

255 in the gut microbiomes of rat, human and mouse, respectively.

## 256 Conclusions

257 The newly established catalogue of the SD rat gut metagenome comprised ~5.1 million (M)

258 non-redundant genes, which is almost twice the number of microbial gene in the mouse catalog

259 comprising 2.6 M genes established by sequencing samples from different facilities and different

260 mouse strain, and also including samples from low fat fed as well as high fat fed mice. Not

1  
2  
3  
4  
5  
6  
7  
8  
9  
10  
11  
12  
13  
14  
15  
16  
17  
18  
19  
20  
21  
22  
23  
24  
25  
26  
27  
28  
29  
30  
31  
32  
33  
34  
35  
36  
37  
38  
39  
40  
41  
42  
43  
44  
45  
46  
47  
48  
49  
50  
51  
52  
53  
54  
55  
56  
57  
58  
59  
60  
61  
62  
63  
64  
65

1 261 surprisingly, the overlap between microbial gene in rat and mouse is larger than between the rodents  
2  
3 262 and human. However, the overall conclusion based on the available catalogs of gene in the gut  
4  
5  
6 263 microbiota of human[35], mouse[34], rat and pig [36] points to the remarkable differences in gene  
7  
8  
9 264 sequences in these four mammalian species implying that specific catalog for each mammalian species  
10  
11 265 need to be produced for detailed analyses of the structural and functional analyses of the gut microbiota  
12  
13  
14 266 even though the microbiotas of the four mammals functionally are closely related. Thus, we envisage  
15  
16  
17 267 that the present catalog of genes in the rat gut microbiome will serve as a valuable resource for future  
18  
19  
20 268 work using rats as a model for investigating the role of the gut microbiota and the interactions with the  
21  
22  
23 269 host in health and disease.

24  
25 270

#### 26 271 **Funding**

27  
28  
29 272 This work was financially supported by grants from the Macau Technology Development Fund  
30  
31  
32 273 (102/2016/A3), the Shenzhen Municipal Government of China (JSGG20160229172752028,  
33  
34  
35 274 JCYJ20160229172757249) and the National Natural Science Foundation of China (Grant No.  
36  
37  
38  
39 275 81670606 ) .

#### 40 276 **Availability of supporting data**

41  
42  
43 277 The sequencing reads from each sequencing library have been deposited at EBI with the accession  
44  
45  
46 278 number: PRJEB22973. The reference catalogue of the 5.1 million genes and related data in this article  
47  
48  
49 279 are available in the *GigaScience* database, GigaDB[37]. All supplementary figures and tables are  
50  
51  
52 280 provided as additional file.

#### 53 281 **Conflicts of interest**

54  
55  
56 282 The authors declare no competing financial interests.  
57  
58  
59  
60  
61  
62  
63  
64  
65

1 283 **Author contributions**

2  
3 284 Design of the study, L. Liu. and H.J. Jia; Methodology, H.D. Pan, R.J. Guo, J. Zhu, Q. Wang, Y.M. Ju,  
4  
5  
6 285 Y.F. Zheng, Y. Xie, Z.Q. Liu, L.L. Lu, X.P. Li and T. Li; Investigation, H.D. Pan, Y.F. Zheng, R.Z. Li,  
7  
8  
9 286 and Z.W. Yuan; Data analysis, R.J. Guo, J. Zhu, Q. Wang, Y.M. Ju and L. Xiao; Sample collection,  
10  
11 287 H.D. Pan, B. Tong; Writing of the first version of the manuscript:, H.D. Pan and R.J. Guo;  
12  
13  
14 288 Restructuring and extensive revision of the manuscript, KK. Supervision, of work, L. Liu and H.J. Jia;  
15  
16  
17 289 Funding acquisition, L. Liu and H.J. Jia.  
18  
19

20 290

21  
22 291 **Reference**

- 23  
24  
25 292 1. Sommer, F., et al., *The resilience of the intestinal microbiota influences health and*  
26  
27  
28 293 *disease*. Nature reviews. Microbiology, 2017. **15**(10): p. 630-638.  
29  
30  
31 294 2. Lynch, S.V. and O. Pedersen, *The Human Intestinal Microbiome in Health and*  
32  
33  
34 295 *Disease*. The New England journal of medicine, 2016. **375**(24): p. 2369-2379.  
35  
36 296 3. Quince, C., et al., *Shotgun metagenomics, from sampling to analysis*. Nature  
37  
38  
39 297 biotechnology, 2017. **35**(9): p. 833-844.  
40  
41  
42 298 4. Liu, R., et al., *Gut microbiome and serum metabolome alterations in obesity and after*  
43  
44  
45 299 *weight-loss intervention*. Nature medicine, 2017. **23**(7): p. 859-868.  
46  
47  
48 300 5. Zhang, X., et al., *The oral and gut microbiomes are perturbed in rheumatoid arthritis*  
49  
50  
51 301 *and partly normalized after treatment*. Nature medicine, 2015. **21**(8): p. 895-905.  
52  
53 302 6. Bhatt, A.P., M.R. Redinbo, and S.J. Bultman, *The role of the microbiome in cancer*  
54  
55  
56 303 *development and therapy*. CA: a cancer journal for clinicians, 2017. **67**(4): p. 326-344.  
57  
58  
59 304 7. Pan, H., et al., *Whether Probiotic Supplementation Benefits Rheumatoid Arthritis*  
60  
61  
62  
63  
64  
65

1 305 *Patients: A Systematic Review and Meta-Analysis*. Engineering, 2017. **3**(1): p.  
2  
3 306 115-121.  
4  
5  
6 307 8. Gu, Y., et al., *Analyses of gut microbiota and plasma bile acids enable stratification of*  
7  
8  
9 308 *patients for antidiabetic treatment*. Nature communications, 2017. **8**(1): p. 1785.  
10  
11 309 9. Vandeputte, D., et al., *Stool consistency is strongly associated with gut microbiota*  
12  
13 310 *richness and composition, enterotypes and bacterial growth rates*. Gut, 2016. **65**(1): p.  
14  
15 311 57-62.  
16  
17 312 10. Johnson, C.L. and J. Versalovic, *The human microbiome and its potential importance*  
18  
19 313 *to pediatrics*. Pediatrics, 2012. **129**(5): p. 950-60.  
20  
21 314 11. Lloyd-Price, J., G. Abu-Ali, and C. Huttenhower, *The healthy human microbiome*.  
22  
23 315 Genome medicine, 2016. **8**(1): p. 51.  
24  
25 316 12. McInnes, I.B. and G. Schett, *The pathogenesis of rheumatoid arthritis*. The New  
26  
27 317 England journal of medicine, 2011. **365**(23): p. 2205-19.  
28  
29 318 13. Waksman, B.H., C.M. Pearson, and J.T. Sharp, *Studies of arthritis and other lesions*  
30  
31 319 *induced in rats by injection of mycobacterial adjuvant. II. Evidence that the disease is*  
32  
33 320 *a disseminated immunologic response to exogenous antigen*. Journal of immunology,  
34  
35 321 1960. **85**: p. 403-17.  
36  
37 322 14. Pearson, C.M. and F.D. Wood, *Studies of arthritis and other lesions induced in rats by*  
38  
39 323 *the injection of mycobacterial adjuvant. VII. Pathologic details of the arthritis and*  
40  
41 324 *spondylitis*. The American journal of pathology, 1963. **42**: p. 73-95.  
42  
43 325 15. Cai, X., et al., *Manipulation of the induction of adjuvant arthritis in Sprague-Dawley*  
44  
45 326 *rats*. Inflammation research : official journal of the European Histamine Research  
46  
47  
48  
49  
50  
51  
52  
53  
54  
55  
56  
57  
58  
59  
60  
61  
62  
63  
64  
65

1 327 Society ... [et al.], 2006. **55**(9): p. 368-77.

2

3 328 16. Hegen, M., et al., *Utility of animal models for identification of potential therapeutics for*

4

5

6 329 *rheumatoid arthritis*. *Annals of the rheumatic diseases*, 2008. **67**(11): p. 1505-15.

7

8

9 330 17. Srinivasan, K., et al., *Combination of high-fat diet-fed and low-dose*

10

11 331 *streptozotocin-treated rat: a model for type 2 diabetes and pharmacological screening*.

12

13

14 332 *Pharmacological research*, 2005. **52**(4): p. 313-20.

15

16

17 333 18. Levin, B.E., et al., *Selective breeding for diet-induced obesity and resistance in*

18

19

20 334 *Sprague-Dawley rats*. *The American journal of physiology*, 1997. **273**(2 Pt 2): p.

21

22 335 R725-30.

23

24

25 336 19. Zhang, R. and L. Lao, *A new rat model of bone cancer pain*. *Methods in molecular*

26

27

28 337 *biology*, 2012. **851**: p. 261-73.

29

30

31 338 20. Delbosc, S., et al., *Involvement of oxidative stress and NADPH oxidase activation in*

32

33

34 339 *the development of cardiovascular complications in a model of insulin resistance, the*

35

36 340 *fructose-fed rat*. *Atherosclerosis*, 2005. **179**(1): p. 43-9.

37

38

39 341 21. Flemer, B., et al., *Fecal microbiota variation across the lifespan of the healthy*

40

41

42 342 *laboratory rat*. *Gut microbes*, 2017. **8**(5): p. 428-439.

43

44

45 343 22. Cronstein, B.N., *Low-dose methotrexate: a mainstay in the treatment of rheumatoid*

46

47 344 *arthritis*. *Pharmacological reviews*, 2005. **57**(2): p. 163-72.

48

49

50 345 23. Wu, J., et al., *Simultaneous Determination of Multiple Components in Guanjiakang in*

51

52 346 *Rat Plasma via the UPLC-MS/MS Method and Its Application in Pharmacokinetic*

53

54

55 347 *Study*. *Molecules*, 2016. **21**(12).

56

57

58 348 24. Chen, X.M., et al., *Systemic Review and Meta-Analysis of the Clinical Efficacy and*

59

60

61

62

63

64

65



1 349 *Adverse Effects of Zhengqing Fengtongning Combined with Methotrexate in*  
2  
3 350 *Rheumatoid Arthritis. Evidence-based complementary and alternative medicine :*  
4  
5  
6 351 eCAM, 2015. **2015**: p. 910376.  
7  
8  
9 352 25. Qin, J., et al., *A metagenome-wide association study of gut microbiota in type 2*  
10  
11 353 *diabetes. Nature*, 2012. **490**(7418): p. 55-60.  
12  
13  
14 354 26. Huang, J., et al., *A reference human genome dataset of the BGISEQ-500 sequencer.*  
15  
16 355 *GigaScience*, 2017. **6**(5): p. 1-9.  
17  
18  
19 356 27. Mende, D.R., et al., *Assessment of metagenomic assembly using simulated next*  
20  
21 357 *generation sequencing data. PloS one*, 2012. **7**(2): p. e31386.  
22  
23  
24 358 28. Kultima, J.R., et al., *MOCAT: a metagenomics assembly and gene prediction toolkit.*  
25  
26 359 *PloS one*, 2012. **7**(10): p. e47656.  
27  
28  
29 360 29. Li, R., et al., *SOAP2: an improved ultrafast tool for short read alignment.*  
30  
31 361 *Bioinformatics*, 2009. **25**(15): p. 1966-7.  
32  
33  
34 362 30. Peng, Y., et al., *IDBA-UD: a de novo assembler for single-cell and metagenomic*  
35  
36 363 *sequencing data with highly uneven depth. Bioinformatics*, 2012. **28**(11): p. 1420-8.  
37  
38  
39 364 31. Hyatt, D., et al., *Prodigal: prokaryotic gene recognition and translation initiation site*  
40  
41 365 *identification. BMC bioinformatics*, 2010. **11**: p. 119.  
42  
43  
44 366 32. Li, W. and A. Godzik, *Cd-hit: a fast program for clustering and comparing large sets of*  
45  
46 367 *protein or nucleotide sequences. Bioinformatics*, 2006. **22**(13): p. 1658-9.  
47  
48  
49 368 33. Xie, H., et al., *Shotgun Metagenomics of 250 Adult Twins Reveals Genetic and*  
50  
51 369 *Environmental Impacts on the Gut Microbiome. Cell systems*, 2016. **3**(6): p. 572-584  
52  
53  
54  
55  
56  
57  
58 370 e3.  
59  
60  
61  
62  
63  
64  
65

1  
2  
3  
4  
5  
6  
7  
8  
9  
10  
11  
12  
13  
14  
15  
16  
17  
18  
19  
20  
21  
22  
23  
24  
25  
26  
27  
28  
29  
30  
31  
32  
33  
34  
35  
36  
37  
38  
39  
40  
41  
42  
43  
44  
45  
46  
47  
48  
49  
50  
51  
52  
53  
54  
55  
56  
57  
58  
59  
60  
61  
62  
63  
64  
65

371 34. Xiao, L., et al., *A catalog of the mouse gut metagenome*. Nature biotechnology, 2015.  
372 **33**(10): p. 1103-8.

373 35. Li, J., et al., *An integrated catalog of reference genes in the human gut microbiome*.  
374 Nature biotechnology, 2014. **32**(8): p. 834-41.

375 36. Xiao, L., et al., *A reference gene catalogue of the pig gut microbiome*. Nature  
376 microbiology, 2016: p. 16161.

377 37. Pan H, Guo R, Zhu J, Wang Q, Ju Y, Xie Y, et al.: A gene catalogue of the  
378 Sprague-Dawley rat gut metagenome GigaScience Database 2018.  
379 <http://dx.doi.org/10.5524/100440>

380  
381

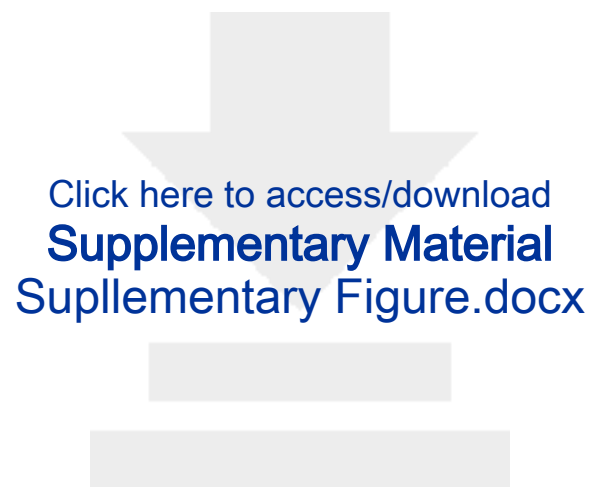

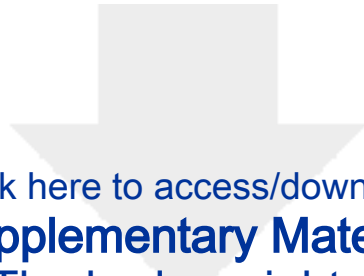

Click here to access/download  
**Supplementary Material**  
sTable1. The body weight of rats.xlsx

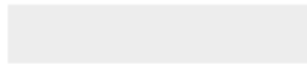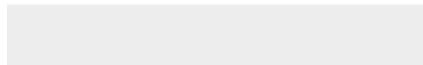

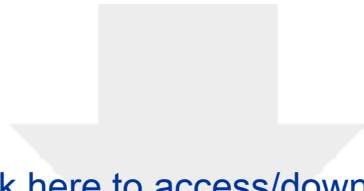

Click here to access/download  
**Supplementary Material**  
sTable2.Data for Gene catalogue.xlsx

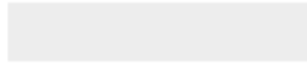

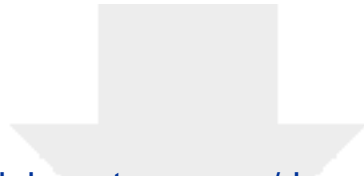

Click here to access/download

**Supplementary Material**

sTable3.Reads of SE100 for Alignment.xlsx

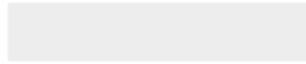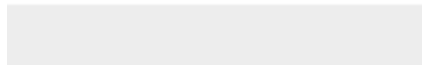

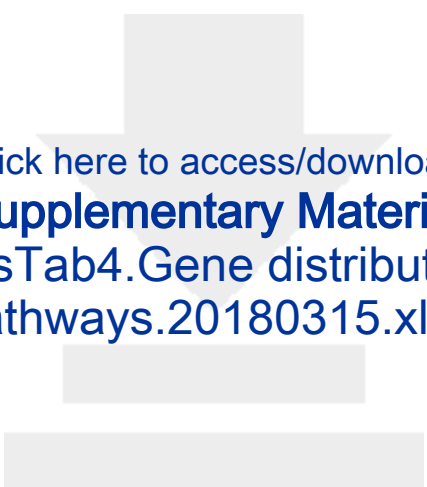

Click here to access/download  
**Supplementary Material**  
New-sTab4.Gene distribution in  
pathways.20180315.xlsx

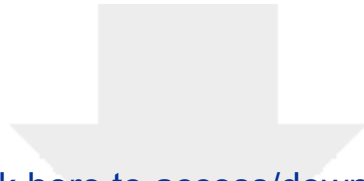

[Click here to access/download](#)

**Supplementary Material**

[New-sTab5.Gene distribution in modules.20180315.xlsx](#)

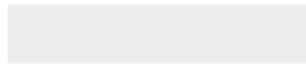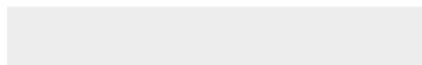



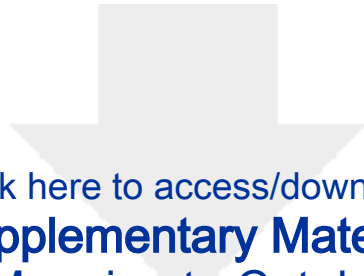

Click here to access/download  
**Supplementary Material**  
sTable6.Mapping to Catalogues.xlsx



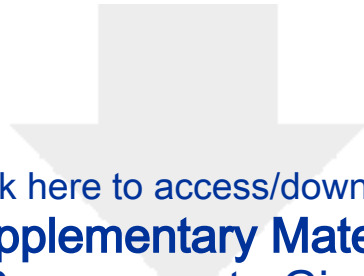

[Click here to access/download](#)

**Supplementary Material**

[2018-03-22 Responses to Gigascience.docx](#)



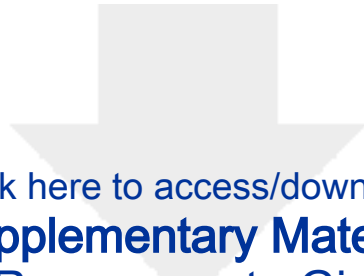

Click here to access/download  
**Supplementary Material**  
2018-03-22 Responses to Gigascience.pdf

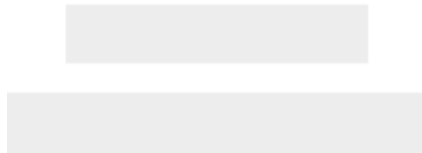

Supplement: giy055_giga-d-17-00275_revision_1.pdf [file giy055_giga-d-17-00275_revision_1.pdf]
